# Supplementary material
Source: PubMed Central journal article supplement (PMC7309575)
Supplement: jamaneurol-e201760-s001.pdf [file jamaneurol-e201760-s001.pdf]

## Supplementary Online Content

Raghavan NS, Dumitrescu L, Mormino E, et al; Alzheimer's Disease Neuroimaging Initiative. Association between common variants in *RBFOX1*, an RNA-binding protein, and brain amyloidosis in early and preclinical Alzheimer disease. *JAMA Neurol*. Published online June 22, 2020. doi:10.1001/jamaneurol.2020.1760

**eTable 1.** Summary of Imputation and Quality Control Measures Performed on Each Dataset

**eTable 2.** Summary of Protocols for Amyloid Acquisition by Site

**eTable 3.** Top PET Amyloid Meta-analysis GWAS Associations ( $p < 1e-5$ )

**eTable 4.** *RBFOX1* Brain Expression Associations With Amyloid Burden Adjusted for Cell-Type Composition

**eFigure 1.** Density Histogram of Normalized Amyloid PET Measures per Study

**eFigure 2.** Locus Zoom Plots of the APOE Region in Conditional Analyses

**eFigure 3.** QQ-Plot for the Meta-analysis of Amyloid PET Across All Cohorts

**eFigure 4.** Lower *RBFOX1* Expression in the Prefrontal Cortex Was Associated With Higher Amyloid Burden

**eFigure 5.** Lower *RBFOX1* Expression in the Prefrontal Cortex Was Associated With a Faster Rate of Global Cognitive Decline

This supplementary material has been provided by the authors to give readers additional information about their work.

| <b>eTable 1.</b> Summary of imputation and quality control measures performed on each dataset                                                                                                                                                                                                                                                                                                                                                                                                                                                                                                                                                                                                                                                  |                                        |                    |                      |                       |                      |                        |                      |
|------------------------------------------------------------------------------------------------------------------------------------------------------------------------------------------------------------------------------------------------------------------------------------------------------------------------------------------------------------------------------------------------------------------------------------------------------------------------------------------------------------------------------------------------------------------------------------------------------------------------------------------------------------------------------------------------------------------------------------------------|----------------------------------------|--------------------|----------------------|-----------------------|----------------------|------------------------|----------------------|
|                                                                                                                                                                                                                                                                                                                                                                                                                                                                                                                                                                                                                                                                                                                                                |                                        | <b>Pre-QC</b>      |                      | <b>Pre-imputation</b> |                      | <b>Post-imputation</b> |                      |
| <b>Dataset</b>                                                                                                                                                                                                                                                                                                                                                                                                                                                                                                                                                                                                                                                                                                                                 | <b>Platform</b>                        | <b>Sample size</b> | <b># of variants</b> | <b>Sample size</b>    | <b># of variants</b> | <b>Sample size</b>     | <b># of variants</b> |
| <b>A4</b>                                                                                                                                                                                                                                                                                                                                                                                                                                                                                                                                                                                                                                                                                                                                      | Illumina Global Screening Array        | 3467               | 700,078              | 3329                  | 450,970              | 3329                   | 9,599,403            |
| <b>ADNI 1</b>                                                                                                                                                                                                                                                                                                                                                                                                                                                                                                                                                                                                                                                                                                                                  | Illumina 610-Quad                      | 757                | 620,901              | 666                   | 536,557              | 666                    | 6,577,704            |
| <b>ADNI 2</b>                                                                                                                                                                                                                                                                                                                                                                                                                                                                                                                                                                                                                                                                                                                                  | Illumina OmniExpress                   | 432                | 730,525              | 430                   | 641,075              | 430                    | 6,662,117            |
| <b>ADNI WGS</b>                                                                                                                                                                                                                                                                                                                                                                                                                                                                                                                                                                                                                                                                                                                                | Illumina Omni 2.5M (WGS Platform)      | 812                | 2,379,855            | 807                   | 1,480,134            | 807                    | 7,298,856            |
| <b>ADNI (merged)</b>                                                                                                                                                                                                                                                                                                                                                                                                                                                                                                                                                                                                                                                                                                                           | (merge)                                | 1903               | 7,571,217            | N/A                   | N/A                  | 1,247                  | 7,849,615            |
| <b>Berkeley</b>                                                                                                                                                                                                                                                                                                                                                                                                                                                                                                                                                                                                                                                                                                                                | Illumina OmniExpress-Exome             | 311                | 974,341              | 238                   | 643,967              | 236                    | 6,579,172            |
| <b>BIOCARD</b>                                                                                                                                                                                                                                                                                                                                                                                                                                                                                                                                                                                                                                                                                                                                 | Illumina OmniExpress                   | 261                | 730,525              | 193                   | 638,868              | 190                    | 6,559,742            |
| <b>BLSA - 550K</b>                                                                                                                                                                                                                                                                                                                                                                                                                                                                                                                                                                                                                                                                                                                             | Illumina HumanHap 550                  | 1,039              | 496,358              | 734                   | 495,157              | 734                    | 6,276,903            |
| <b>BLSA - NeuroChip</b>                                                                                                                                                                                                                                                                                                                                                                                                                                                                                                                                                                                                                                                                                                                        | NeuroChip                              | 1,292              | 730,525              | 893                   | 630,218              | 893                    | 5,632,403            |
| <b>BLSA (merged)</b>                                                                                                                                                                                                                                                                                                                                                                                                                                                                                                                                                                                                                                                                                                                           | (merge)                                | 1,323              | 6,466,613            | N/A                   | N/A                  | 1,184                  | 5,439,477            |
| <b>WRAP</b>                                                                                                                                                                                                                                                                                                                                                                                                                                                                                                                                                                                                                                                                                                                                    | Illumina Multi-Ethnic Genotyping Array | 1340               | 1,779,819            | 1198                  | 898,220              | 1,198                  | 10,499,994           |
| <p>Note: Since genetic data for the ADNI and BLSA studies were done on multiple platforms, QC and imputation were completed on each set separately and were merged after post-imputation filters. For these merged sets, number of samples and variants immediately after merging and after additional filtering for overlap and relatedness are in the "Pre-QC" and "Post-imputation" columns respectively.</p> <p>Abbreviations: A4=Anti-Amyloid Treatment in Asymptomatic Alzheimer's Disease clinical trial; ADNI=Alzheimer's Disease Neuroimaging Initiative; WRAP=Wisconsin Registry for Alzheimer's Prevention; BIOCARD=Biomarkers of Cognitive Decline Among Normal Individuals cohort; BLSA=Baltimore Longitudinal Study of Aging</p> |                                        |                    |                      |                       |                      |                        |                      |

| <b>eTable 2: Summary of protocols for amyloid acquisition by site</b>                                                                                                                                                                                                                                                                                                                                                                                                                                                                                                                                                                                                                                                                          |                                     |                     |             |                           |                         |
|------------------------------------------------------------------------------------------------------------------------------------------------------------------------------------------------------------------------------------------------------------------------------------------------------------------------------------------------------------------------------------------------------------------------------------------------------------------------------------------------------------------------------------------------------------------------------------------------------------------------------------------------------------------------------------------------------------------------------------------------|-------------------------------------|---------------------|-------------|---------------------------|-------------------------|
| <b>Dataset</b>                                                                                                                                                                                                                                                                                                                                                                                                                                                                                                                                                                                                                                                                                                                                 | <b>Scanner Platform</b>             | <b>Ligand</b>       | <b>Dose</b> | <b>Acquisition Window</b> | <b>Reference Region</b> |
| <b>A4</b>                                                                                                                                                                                                                                                                                                                                                                                                                                                                                                                                                                                                                                                                                                                                      | Multiple (GE, Philips, and Siemens) | Florbetapir         | 10mCi       | 50-70 min                 | whole cerebellum        |
| <b>ADNI (Florbetapir)</b>                                                                                                                                                                                                                                                                                                                                                                                                                                                                                                                                                                                                                                                                                                                      | Multiple (GE, Philips, and Siemens) | Florbetapir         | 10mCi       | 50-70 min                 | whole cerebellum        |
| <b>ADNI (PiB)</b>                                                                                                                                                                                                                                                                                                                                                                                                                                                                                                                                                                                                                                                                                                                              | Multiple (GE, Philips, and Siemens) | C <sup>11</sup> PiB | 15mCi       | 50-70 min                 | whole cerebellum        |
| <b>Berkeley</b>                                                                                                                                                                                                                                                                                                                                                                                                                                                                                                                                                                                                                                                                                                                                | Siemens ECAT EXACT                  | C <sup>11</sup> PiB | 15mCi       | 0-90 min                  | cerebellum grey matter  |
| <b>BIOCARD</b>                                                                                                                                                                                                                                                                                                                                                                                                                                                                                                                                                                                                                                                                                                                                 | GE Advance                          | C <sup>11</sup> PiB | 15mCi       | 0-70 min                  | whole cerebellum        |
| <b>BLSA</b>                                                                                                                                                                                                                                                                                                                                                                                                                                                                                                                                                                                                                                                                                                                                    | GE Advance                          | C <sup>11</sup> PiB | 15mCi       | 0-70 min                  | whole cerebellum        |
| <b>WRAP</b>                                                                                                                                                                                                                                                                                                                                                                                                                                                                                                                                                                                                                                                                                                                                    | Siemens ECAT EXACT                  | C <sup>11</sup> PiB | 15mCi       | 0-70 min                  | cerebellum grey matter  |
| <p>Note: Since genetic data for the ADNI and BLSA studies were done on multiple platforms, QC and imputation were completed on each set separately and were merged after post-imputation filters. For these merged sets, number of samples and variants immediately after merging and after additional filtering for overlap and relatedness are in the "Pre-QC" and "Post-imputation" columns respectively.</p> <p>Abbreviations: A4=Anti-Amyloid Treatment in Asymptomatic Alzheimer's Disease clinical trial; ADNI=Alzheimer's Disease Neuroimaging Initiative; WRAP=Wisconsin Registry for Alzheimer's Prevention; BIOCARD=Biomarkers of Cognitive Decline Among Normal Individuals cohort; BLSA=Baltimore Longitudinal Study of Aging</p> |                                     |                     |             |                           |                         |

**eTable 3:** Top PET amyloid meta-analysis GWAS associations (p < 1e-5)

Note: Meta-analysis results are presented in the first set of columns, followed by the results for each va  
 Abbreviations: MAF=minor allele frequency; CHR=chromosome; SE=standard error; N=number of samp

| CHR | SNP       | BP       | MAF    | A1 | Meta |         |        |           |
|-----|-----------|----------|--------|----|------|---------|--------|-----------|
|     |           |          |        |    | N    | BETA    | SE     | P         |
| 19  | rs6857    | 45392254 | 0.2129 | T  | 4314 | 1.6742  | 0.0685 | 5.79E-132 |
| 19  | rs5900738 | 45396665 | 0.2512 | T  | 4314 | 1.3529  | 0.0648 | 7.02E-97  |
| 19  | rs2075650 | 45395619 | 0.1774 | G  | 4314 | 1.5065  | 0.0742 | 1.01E-91  |
| 19  | rs157582  | 45396219 | 0.2702 | T  | 4314 | 1.2992  | 0.0641 | 1.78E-91  |
| 19  | rs3440455 | 45395909 | 0.1771 | G  | 4314 | 1.5049  | 0.0743 | 3.38E-91  |
| 19  | rs1155650 | 45396144 | 0.1771 | T  | 4314 | 1.5039  | 0.0743 | 4.33E-91  |
| 19  | rs157581  | 45395714 | 0.2718 | C  | 4314 | 1.2821  | 0.0638 | 1.05E-89  |
| 19  | rs283815  | 45390333 | 0.2724 | G  | 4314 | 1.2804  | 0.0638 | 1.28E-89  |
| 19  | rs7135223 | 45394336 | 0.1786 | C  | 4314 | 1.503   | 0.0753 | 1.27E-88  |
| 19  | rs184017  | 45394969 | 0.2707 | G  | 4314 | 1.2735  | 0.0639 | 1.83E-88  |
| 19  | rs1297297 | 45387596 | 0.1781 | A  | 4314 | 1.4787  | 0.0751 | 2.82E-86  |
| 19  | rs1297215 | 45387459 | 0.1779 | G  | 4314 | 1.4756  | 0.0752 | 8.07E-86  |
| 19  | rs3434264 | 45388130 | 0.1802 | A  | 4314 | 1.4599  | 0.0748 | 9.90E-85  |
| 19  | rs3409532 | 45395844 | 0.1438 | A  | 4314 | 1.349   | 0.0825 | 4.84E-60  |
| 19  | rs157580  | 45395266 | 0.3542 | G  | 4314 | -0.6324 | 0.0593 | 1.58E-26  |
| 19  | rs1038026 | 45405062 | 0.4295 | G  | 4314 | -0.5734 | 0.0583 | 8.05E-23  |
| 19  | rs1160985 | 45403412 | 0.4294 | T  | 4314 | -0.5716 | 0.0583 | 1.14E-22  |
| 19  | rs760136  | 45403858 | 0.4294 | G  | 4314 | -0.5716 | 0.0583 | 1.14E-22  |
| 19  | rs741780  | 45404431 | 0.4294 | C  | 4314 | -0.5716 | 0.0583 | 1.14E-22  |
| 19  | rs1038025 | 45404972 | 0.4295 | C  | 4314 | -0.5716 | 0.0583 | 1.14E-22  |
| 19  | rs7259620 | 45407788 | 0.4226 | A  | 4314 | -0.561  | 0.0579 | 3.23E-22  |
| 19  | rs440446  | 45409167 | 0.333  | C  | 4314 | -0.5356 | 0.0604 | 7.15E-19  |
| 19  | rs769450  | 45410444 | 0.3885 | A  | 4314 | -0.5081 | 0.0594 | 1.19E-17  |
| 19  | rs1305062 | 45405521 | 0.3837 | C  | 4314 | -0.4843 | 0.0597 | 4.97E-16  |
| 19  | rs3487890 | 45402477 | 0.3858 | T  | 4314 | -0.4807 | 0.0597 | 8.50E-16  |
| 19  | rs8106922 | 45401666 | 0.3771 | G  | 4314 | -0.4631 | 0.0594 | 6.58E-15  |
| 19  | rs405697  | 45404691 | 0.2425 | A  | 4314 | -0.5152 | 0.0666 | 1.04E-14  |
| 19  | rs2238681 | 45398817 | 0.3779 | T  | 4314 | -0.4493 | 0.0594 | 3.75E-14  |
| 19  | rs405509  | 45408836 | 0.492  | T  | 4314 | 0.4157  | 0.0576 | 5.44E-13  |
| 19  | rs2927468 | 45357939 | 0.4673 | A  | 4314 | -0.405  | 0.0573 | 1.55E-12  |
| 19  | rs6859    | 45382034 | 0.45   | A  | 4314 | 0.4003  | 0.0571 | 2.33E-12  |
| 19  | rs1041083 | 45358353 | 0.467  | T  | 4314 | -0.4017 | 0.0573 | 2.36E-12  |
| 19  | rs4803764 | 45357377 | 0.2739 | C  | 4314 | 0.4366  | 0.0643 | 1.09E-11  |
| 19  | rs5631781 | 45359586 | 0.2762 | T  | 4314 | 0.4299  | 0.0639 | 1.78E-11  |
| 19  | rs1246257 | 45359706 | 0.276  | A  | 4314 | 0.4302  | 0.064  | 1.80E-11  |
| 19  | rs7305020 | 45356464 | 0.2738 | A  | 4314 | 0.4277  | 0.0643 | 2.92E-11  |
| 19  | rs3539632 | 45357003 | 0.2932 | G  | 4314 | 0.4135  | 0.0624 | 3.38E-11  |
| 19  | rs3745150 | 45385759 | 0.383  | C  | 4314 | -0.39   | 0.0593 | 4.94E-11  |
| 19  | rs4803763 | 45357291 | 0.2772 | C  | 4314 | 0.4164  | 0.0637 | 6.20E-11  |
| 19  | rs2972559 | 45355721 | 0.2775 | G  | 4314 | 0.408   | 0.0635 | 1.28E-10  |
| 19  | rs2075649 | 45395330 | 0.374  | G  | 4314 | -0.3805 | 0.0599 | 2.06E-10  |

|              |          |        |   |      |         |        |          |
|--------------|----------|--------|---|------|---------|--------|----------|
| 19 rs1040227 | 45329214 | 0.3319 | G | 4314 | 0.3723  | 0.0601 | 5.81E-10 |
| 19 rs1040252 | 45329344 | 0.3319 | C | 4314 | 0.3723  | 0.0601 | 5.81E-10 |
| 19 rs1216222 | 45348522 | 0.2994 | T | 4314 | 0.3796  | 0.0625 | 1.25E-09 |
| 19 rs2199575 | 45345623 | 0.3007 | A | 4314 | 0.3697  | 0.0623 | 3.00E-09 |
| 16 rs5608188 | 6903160  | 0.0871 | G | 4314 | 0.6119  | 0.1033 | 3.18E-09 |
| 19 rs1040569 | 45326664 | 0.3317 | T | 4314 | 0.3516  | 0.0601 | 4.88E-09 |
| 19 rs5813266 | 45328367 | 0.3362 | T | 4314 | 0.3491  | 0.0598 | 5.21E-09 |
| 19 rs5882644 | 45328379 | 0.3362 | A | 4314 | 0.3491  | 0.0598 | 5.21E-09 |
| 19 rs5844655 | 45328380 | 0.3362 | A | 4314 | 0.3491  | 0.0598 | 5.21E-09 |
| 19 rs1041241 | 45327309 | 0.3373 | T | 4314 | 0.3455  | 0.0598 | 7.64E-09 |
| 19 rs4803758 | 45327423 | 0.3373 | T | 4314 | 0.3455  | 0.0598 | 7.64E-09 |
| 16 rs3486094 | 6919189  | 0.0888 | G | 4314 | 0.5946  | 0.1032 | 8.22E-09 |
| 16 rs1723420 | 6917897  | 0.0902 | G | 4314 | 0.5851  | 0.1025 | 1.14E-08 |
| 19 rs7359852 | 45336035 | 0.3152 | C | 4314 | 0.3443  | 0.0604 | 1.20E-08 |
| 19 rs1040633 | 45326217 | 0.3352 | C | 4314 | 0.3405  | 0.0599 | 1.29E-08 |
| 16 rs1291926 | 6922307  | 0.0856 | T | 4314 | 0.5958  | 0.1051 | 1.43E-08 |
| 16 rs1292652 | 6918341  | 0.0905 | G | 4314 | 0.5801  | 0.1024 | 1.48E-08 |
| 19 rs7304828 | 45338523 | 0.3116 | C | 4314 | 0.3471  | 0.0615 | 1.69E-08 |
| 19 rs1246227 | 45341540 | 0.312  | G | 4314 | 0.3462  | 0.0616 | 1.89E-08 |
| 19 rs2927480 | 45337385 | 0.3113 | C | 4314 | 0.3429  | 0.0612 | 2.06E-08 |
| 16 rs3492553 | 6931990  | 0.0906 | C | 4314 | 0.5704  | 0.1023 | 2.46E-08 |
| 16 rs3457438 | 6915549  | 0.0903 | C | 4314 | 0.5711  | 0.1025 | 2.51E-08 |
| 16 rs3439933 | 6915590  | 0.0903 | C | 4314 | 0.5711  | 0.1025 | 2.51E-08 |
| 16 rs3477062 | 6927009  | 0.0906 | G | 4314 | 0.5685  | 0.1023 | 2.73E-08 |
| 19 rs3021439 | 45336443 | 0.3115 | A | 4314 | 0.3371  | 0.0609 | 3.14E-08 |
| 19 rs1245957 | 45341904 | 0.313  | A | 4314 | 0.3293  | 0.0609 | 6.44E-08 |
| 16 rs1164698 | 6911210  | 0.0895 | G | 4314 | 0.5548  | 0.1028 | 6.74E-08 |
| 19 rs7304829 | 45340736 | 0.3128 | A | 4314 | 0.326   | 0.0609 | 8.56E-08 |
| 19 rs7457986 | 45342007 | 0.3147 | C | 4314 | 0.3284  | 0.0615 | 9.37E-08 |
| 19 rs4803761 | 45342114 | 0.3227 | G | 4314 | 0.3214  | 0.0606 | 1.12E-07 |
| 19 rs4239533 | 45342241 | 0.3089 | A | 4314 | -0.3282 | 0.0623 | 1.36E-07 |
| 19 rs4605275 | 45338493 | 0.3046 | T | 4314 | -0.3278 | 0.0626 | 1.63E-07 |
| 19 rs157590  | 45398716 | 0.4769 | C | 4314 | -0.3025 | 0.0584 | 2.20E-07 |
| 19 rs1166725 | 45337737 | 0.3014 | C | 4314 | -0.3228 | 0.0628 | 2.71E-07 |
| 19 rs1040743 | 45341948 | 0.3016 | A | 4314 | -0.3223 | 0.0628 | 2.82E-07 |
| 19 rs4803759 | 45327459 | 0.2971 | T | 4314 | -0.3236 | 0.0632 | 3.05E-07 |
| 19 rs4369782 | 45338220 | 0.3013 | A | 4314 | -0.3213 | 0.0628 | 3.08E-07 |
| 19 rs406456  | 45382717 | 0.4131 | G | 4314 | 0.2992  | 0.0589 | 3.85E-07 |
| 19 rs4803762 | 45342161 | 0.3161 | A | 4314 | 0.3058  | 0.0608 | 4.92E-07 |
| 9 rs1953019  | 79765571 | 0.4622 | C | 4314 | 0.2843  | 0.057  | 6.03E-07 |
| 9 rs1953020  | 79765599 | 0.4622 | C | 4314 | 0.2843  | 0.057  | 6.03E-07 |
| 9 rs2377886  | 79765465 | 0.4621 | C | 4314 | 0.2839  | 0.057  | 6.33E-07 |
| 9 rs7869751  | 79763921 | 0.4639 | G | 4314 | 0.2836  | 0.057  | 6.50E-07 |
| 9 rs5000552  | 79764559 | 0.4643 | C | 4314 | 0.2837  | 0.057  | 6.52E-07 |
| 9 rs4548251  | 79763758 | 0.4629 | T | 4314 | 0.2834  | 0.057  | 6.64E-07 |
| 9 rs2840271  | 79763630 | 0.4532 | G | 4314 | 0.2836  | 0.0571 | 6.72E-07 |
| 19 rs2927481 | 45337249 | 0.3369 | A | 4314 | 0.295   | 0.0594 | 6.84E-07 |

|    |           |          |        |   |      |         |        |          |
|----|-----------|----------|--------|---|------|---------|--------|----------|
| 9  | rs7855075 | 79764116 | 0.4631 | A | 4314 | 0.2828  | 0.057  | 7.02E-07 |
| 9  | rs7854404 | 79764271 | 0.4631 | A | 4314 | 0.2828  | 0.057  | 7.02E-07 |
| 9  | rs1114529 | 79766561 | 0.46   | G | 4314 | 0.282   | 0.0569 | 7.18E-07 |
| 17 | rs8068468 | 67188545 | 0.1596 | C | 4314 | 0.5514  | 0.1118 | 8.13E-07 |
| 19 | rs2927482 | 45340138 | 0.3135 | G | 4314 | -0.3046 | 0.0619 | 8.48E-07 |
| 9  | rs1329622 | 79765911 | 0.4633 | C | 4314 | 0.2793  | 0.0569 | 9.31E-07 |
| 9  | rs1329623 | 79766154 | 0.4623 | A | 4314 | 0.2789  | 0.0569 | 9.46E-07 |
| 1  | rs2201596 | 2.47E+08 | 0.4828 | G | 4314 | -0.2844 | 0.0583 | 1.06E-06 |
| 16 | rs6788772 | 6957715  | 0.0915 | T | 4314 | 0.4954  | 0.102  | 1.20E-06 |
| 19 | rs1166724 | 45337504 | 0.3307 | C | 4314 | 0.2892  | 0.0596 | 1.22E-06 |
| 19 | rs1297624 | 45337863 | 0.3109 | T | 4314 | -0.2995 | 0.0619 | 1.32E-06 |
| 16 | rs6058774 | 6908445  | 0.115  | T | 4314 | 0.4625  | 0.0957 | 1.35E-06 |
| 16 | rs6771214 | 6916200  | 0.127  | A | 4314 | 0.459   | 0.0954 | 1.49E-06 |
| 19 | rs157588  | 45398264 | 0.473  | T | 4314 | -0.2811 | 0.0585 | 1.55E-06 |
| 9  | rs1114529 | 79766461 | 0.4576 | G | 4314 | 0.2733  | 0.0569 | 1.60E-06 |
| 2  | rs1269272 | 1.65E+08 | 0.2668 | T | 4314 | 0.3107  | 0.0651 | 1.81E-06 |
| 21 | rs1008457 | 33860296 | 0.229  | T | 4314 | 0.3167  | 0.0666 | 1.96E-06 |
| 17 | rs7335614 | 67139474 | 0.1516 | T | 4314 | 0.5267  | 0.1113 | 2.22E-06 |
| 2  | rs6749902 | 1.65E+08 | 0.2666 | T | 4314 | 0.306   | 0.0653 | 2.78E-06 |
| 19 | rs157585  | 45397512 | 0.4736 | C | 4314 | -0.2723 | 0.0585 | 3.26E-06 |
| 1  | rs1080247 | 2.47E+08 | 0.4791 | T | 4314 | -0.2705 | 0.0581 | 3.27E-06 |
| 19 | rs5753784 | 45354044 | 0.4994 | G | 4314 | -0.268  | 0.0576 | 3.32E-06 |
| 19 | rs8113311 | 45325738 | 0.286  | T | 4314 | -0.2997 | 0.0645 | 3.35E-06 |
| 12 | rs1169602 | 42146431 | 0.0273 | A | 4314 | -0.8454 | 0.1821 | 3.43E-06 |
| 19 | rs3852860 | 45382966 | 0.4041 | T | 4314 | -0.2711 | 0.0584 | 3.50E-06 |
| 19 | rs1469698 | 38993556 | 0.1446 | T | 4314 | 0.4002  | 0.0864 | 3.66E-06 |
| 5  | rs1003562 | 56628950 | 0.3378 | T | 4314 | 0.2791  | 0.0604 | 3.85E-06 |
| 19 | rs1166632 | 45354296 | 0.4995 | G | 4314 | -0.2658 | 0.0576 | 3.95E-06 |
| 19 | rs4129012 | 45382675 | 0.0382 | A | 4314 | -0.7058 | 0.153  | 3.99E-06 |
| 19 | rs3852861 | 45383061 | 0.4041 | T | 4314 | -0.2691 | 0.0584 | 4.12E-06 |
| 2  | rs1303507 | 1.65E+08 | 0.2287 | G | 4314 | 0.3208  | 0.0699 | 4.50E-06 |
| 11 | rs7621732 | 23786416 | 0.1016 | A | 4314 | 0.5628  | 0.1229 | 4.65E-06 |
| 19 | rs157584  | 45396899 | 0.4784 | C | 4314 | -0.2663 | 0.0584 | 5.15E-06 |
| 11 | rs5715627 | 23788813 | 0.0766 | G | 4314 | 0.578   | 0.1272 | 5.55E-06 |
| 17 | rs6505369 | 32025000 | 0.2552 | T | 4314 | 0.3016  | 0.0665 | 5.69E-06 |
| 17 | rs7221867 | 32025224 | 0.2552 | G | 4314 | 0.3016  | 0.0665 | 5.69E-06 |
| 17 | rs1696875 | 32025309 | 0.2552 | C | 4314 | 0.3016  | 0.0665 | 5.69E-06 |
| 17 | rs6678511 | 32025370 | 0.2552 | A | 4314 | 0.3016  | 0.0665 | 5.69E-06 |
| 17 | rs2046901 | 32025626 | 0.2552 | A | 4314 | 0.3016  | 0.0665 | 5.69E-06 |
| 17 | rs5019187 | 32025786 | 0.2552 | G | 4314 | 0.3016  | 0.0665 | 5.69E-06 |
| 17 | rs7221625 | 32026182 | 0.2552 | A | 4314 | 0.3016  | 0.0665 | 5.69E-06 |
| 17 | rs7215944 | 32026292 | 0.2552 | A | 4314 | 0.3016  | 0.0665 | 5.69E-06 |
| 11 | rs5824790 | 23784998 | 0.0766 | C | 4314 | 0.5758  | 0.1272 | 5.99E-06 |
| 17 | rs7221290 | 32025996 | 0.2727 | A | 4314 | 0.2994  | 0.0662 | 6.02E-06 |
| 11 | rs6187607 | 23780151 | 0.1019 | G | 4314 | 0.5533  | 0.1229 | 6.69E-06 |
| 17 | rs2046897 | 32027896 | 0.2729 | G | 4314 | 0.2978  | 0.0661 | 6.72E-06 |
| 19 | rs1166886 | 45380970 | 0.4476 | T | 4314 | -0.2593 | 0.0576 | 6.85E-06 |

|    |           |          |        |   |      |         |        |          |
|----|-----------|----------|--------|---|------|---------|--------|----------|
| 11 | rs6146782 | 23784983 | 0.1482 | G | 4314 | 0.5361  | 0.1194 | 7.10E-06 |
| 9  | rs1082106 | 95826384 | 0.083  | G | 4314 | -0.4663 | 0.1039 | 7.22E-06 |
| 11 | rs5672585 | 23791834 | 0.0767 | T | 4314 | 0.5715  | 0.1274 | 7.23E-06 |
| 11 | rs6187611 | 23792830 | 0.0767 | G | 4314 | 0.5715  | 0.1274 | 7.23E-06 |
| 11 | rs6187611 | 23794797 | 0.0767 | G | 4314 | 0.5715  | 0.1274 | 7.23E-06 |
| 1  | rs3850818 | 2.47E+08 | 0.4289 | G | 4314 | -0.2604 | 0.0582 | 7.60E-06 |
| 11 | rs6187611 | 23790788 | 0.0767 | G | 4314 | 0.5692  | 0.1273 | 7.80E-06 |
| 11 | rs5851085 | 23791359 | 0.0767 | G | 4314 | 0.5692  | 0.1273 | 7.80E-06 |
| 2  | rs1727107 | 1.9E+08  | 0.1632 | A | 4314 | 0.3589  | 0.0804 | 8.06E-06 |
| 9  | rs7044465 | 1.14E+08 | 0.458  | T | 4314 | 0.2544  | 0.0571 | 8.42E-06 |
| 11 | rs6187608 | 23785253 | 0.1151 | A | 4314 | 0.5383  | 0.1209 | 8.44E-06 |
| 2  | rs1168880 | 1.9E+08  | 0.1636 | A | 4314 | 0.3583  | 0.0805 | 8.55E-06 |
| 19 | rs2972558 | 45356141 | 0.3066 | C | 4314 | -0.2803 | 0.063  | 8.71E-06 |
| 2  | rs1049770 | 1.9E+08  | 0.1664 | C | 4314 | 0.3452  | 0.0777 | 8.78E-06 |
| 18 | rs1941944 | 34988110 | 0.0868 | T | 4314 | -0.4644 | 0.1046 | 9.09E-06 |
| 19 | rs406315  | 45384116 | 0.389  | G | 4314 | 0.2648  | 0.0597 | 9.12E-06 |
| 11 | rs6187608 | 23787642 | 0.0766 | T | 4314 | 0.565   | 0.1274 | 9.13E-06 |
| 9  | rs4979042 | 1.14E+08 | 0.4582 | A | 4314 | 0.2533  | 0.0571 | 9.19E-06 |
| 9  | rs953536  | 1.14E+08 | 0.4582 | C | 4314 | 0.2533  | 0.0571 | 9.19E-06 |
| 11 | rs6187607 | 23783736 | 0.0767 | C | 4314 | 0.5624  | 0.1269 | 9.39E-06 |
| 11 | rs6187607 | 23784132 | 0.0767 | G | 4314 | 0.5624  | 0.1269 | 9.39E-06 |
| 2  | rs4319945 | 1.65E+08 | 0.278  | C | 4314 | 0.2856  | 0.0645 | 9.48E-06 |
| 9  | rs1330080 | 1.14E+08 | 0.4564 | C | 4314 | 0.2536  | 0.0573 | 9.63E-06 |
| 11 | rs6187608 | 23785361 | 0.0766 | C | 4314 | 0.5628  | 0.1273 | 9.84E-06 |
| 9  | rs2418174 | 1.14E+08 | 0.4582 | C | 4314 | 0.2521  | 0.0571 | 1.00E-05 |

ariant in the individual cohorts. In parentheses next to the cohort name is indicated the type of amyloid ac  
oles

| effects    | A4 non-Hispanic White (Florbetapir) |         |         |          | A4 African American (Florbetapir) |          |        |         |
|------------|-------------------------------------|---------|---------|----------|-----------------------------------|----------|--------|---------|
|            | N                                   | BETA    | SE      | P        | N                                 | BETA     | SE     | P       |
| +++++      | 2960                                | 1.603   | 0.07622 | 1.30E-91 | 89                                | 0.5338   | 0.4036 | 0.1896  |
| +++++      | 2960                                | 1.354   | 0.07334 | 4.14E-72 | 89                                | 0.02212  | 0.2592 | 0.9322  |
| +++++      | 2960                                | 1.445   | 0.08327 | 2.43E-64 | 89                                | 0.8609   | 0.3351 | 0.01201 |
| +++++      | 2960                                | 1.287   | 0.07289 | 2.05E-66 | 89                                | 0.3851   | 0.2351 | 0.1053  |
| +++++      | 2960                                | 1.45    | 0.08326 | 1.04E-64 | 89                                | 0.6616   | 0.3487 | 0.06127 |
| +++++      | 2960                                | 1.45    | 0.08326 | 1.04E-64 | 89                                | 0.6616   | 0.3487 | 0.06127 |
| +++++      | 2960                                | 1.27    | 0.07262 | 3.20E-65 | 89                                | 0.3851   | 0.2351 | 0.1053  |
| +++++      | 2960                                | 1.269   | 0.07271 | 5.97E-65 | 89                                | 0.4278   | 0.2309 | 0.06746 |
| +++++      | 2960                                | 1.429   | 0.08345 | 1.03E-62 | 89                                | 0.9441   | 0.4838 | 0.05439 |
| +++++      | 2960                                | 1.269   | 0.07277 | 6.92E-65 | 89                                | 0.3495   | 0.2315 | 0.1349  |
| +++++      | 2960                                | 1.391   | 0.08331 | 7.57E-60 | 89                                | 0.9441   | 0.4838 | 0.05439 |
| +++++      | 2960                                | 1.387   | 0.08337 | 1.87E-59 | 89                                | 0.9441   | 0.4838 | 0.05439 |
| +++++      | 2960                                | 1.381   | 0.08292 | 1.48E-59 | 89                                | 0.9441   | 0.4838 | 0.05439 |
| +++++      | 2960                                | 1.289   | 0.09057 | 1.54E-44 | 89                                | 1.07     | 0.6931 | 0.1264  |
| -----      | 2960                                | -0.5735 | 0.06546 | 3.19E-18 | 89                                | -0.5194  | 0.3505 | 0.1423  |
| -----      | 2960                                | -0.5412 | 0.06495 | 1.19E-16 | 89                                | 0.4058   | 0.2538 | 0.1136  |
| -----      | 2960                                | -0.5389 | 0.06498 | 1.66E-16 | 89                                | 0.4058   | 0.2538 | 0.1136  |
| -----      | 2960                                | -0.5389 | 0.06498 | 1.66E-16 | 89                                | 0.4058   | 0.2538 | 0.1136  |
| -----      | 2960                                | -0.5389 | 0.06498 | 1.66E-16 | 89                                | 0.4058   | 0.2538 | 0.1136  |
| -----      | 2960                                | -0.5389 | 0.06498 | 1.66E-16 | 89                                | 0.4058   | 0.2538 | 0.1136  |
| -----      | 2960                                | -0.5479 | 0.06485 | 4.59E-17 | 89                                | 0.06833  | 0.2293 | 0.7665  |
| -----      | 2960                                | -0.4737 | 0.06722 | 2.27E-12 | 89                                | -0.5283  | 0.3213 | 0.1039  |
| -----      | 2960                                | -0.4867 | 0.06656 | 3.36E-13 | 89                                | -0.2336  | 0.2446 | 0.3423  |
| --+-----   | 2960                                | -0.4615 | 0.0666  | 5.13E-12 | 89                                | -0.2301  | 0.2596 | 0.378   |
| --+-----   | 2960                                | -0.4621 | 0.06651 | 4.54E-12 | 89                                | -0.1826  | 0.2692 | 0.4994  |
| --+-----   | 2960                                | -0.4523 | 0.06644 | 1.20E-11 | 89                                | -0.00245 | 0.2472 | 0.9921  |
| -----+++   | 2960                                | -0.4774 | 0.07407 | 1.34E-10 | 89                                | -0.487   | 0.3637 | 0.1842  |
| +-----     | 2960                                | -0.4428 | 0.06636 | 2.98E-11 | 89                                | 0.000572 | 0.2465 | 0.9982  |
| +++++--++  | 2960                                | -0.4057 | 0.06458 | 3.84E-10 | 89                                | 0.2435   | 0.2416 | 0.3164  |
| -----      | 2960                                | -0.3644 | 0.06441 | 1.68E-08 | 89                                | 0.3823   | 0.2273 | 0.09643 |
| +++++----- | 2960                                | 0.3526  | 0.06418 | 4.27E-08 | 89                                | 0.242    | 0.2337 | 0.3035  |
| -----      | 2960                                | -0.3629 | 0.06441 | 1.93E-08 | 89                                | 0.3497   | 0.2282 | 0.1293  |
| +-----+    | 2960                                | 0.4434  | 0.07116 | 5.27E-10 | 89                                | -0.1611  | 0.4043 | 0.6914  |
| +++++----- | 2960                                | 0.4312  | 0.07126 | 1.62E-09 | 89                                | 0.1847   | 0.3272 | 0.574   |
| +++++----- | 2960                                | 0.4287  | 0.07132 | 2.07E-09 | 89                                | 0.1847   | 0.3272 | 0.574   |
| +-----+    | 2960                                | 0.4396  | 0.07117 | 7.46E-10 | 89                                | -0.1611  | 0.4043 | 0.6914  |
| +++++----- | 2960                                | 0.4336  | 0.06956 | 5.24E-10 | 89                                | 0.02578  | 0.3153 | 0.935   |
| +-----     | 2960                                | -0.3829 | 0.06624 | 8.26E-09 | 89                                | 0.03486  | 0.2567 | 0.8923  |
| +++++----- | 2960                                | 0.4262  | 0.07102 | 2.20E-09 | 89                                | 0.01219  | 0.3258 | 0.9702  |
| +++++----- | 2960                                | 0.4183  | 0.07104 | 4.36E-09 | 89                                | 0.1618   | 0.2975 | 0.5881  |
| -++-----   | 2960                                | -0.3886 | 0.06642 | 5.44E-09 | 89                                | 0.1574   | 0.2808 | 0.5767  |



|           |      |         |         |          |    |          |        |          |
|-----------|------|---------|---------|----------|----|----------|--------|----------|
| ++++++++  | 2960 | 0.3696  | 0.06701 | 3.78E-08 | 89 | 0.2467   | 0.2873 | 0.3929   |
| ++++++++  | 2960 | 0.3696  | 0.06701 | 3.78E-08 | 89 | 0.2467   | 0.2873 | 0.3929   |
| +-----+   | 2960 | 0.3707  | 0.06914 | 8.88E-08 | 89 | -0.00227 | 0.39   | 0.9954   |
| +-----+   | 2960 | 0.3591  | 0.06891 | 2.01E-07 | 89 | -0.02281 | 0.3903 | 0.9535   |
| ++-----+  | 2960 | 0.5229  | 0.1139  | 4.59E-06 | 89 | 2.796    | 0.571  | 4.82E-06 |
| +-----+   | 2960 | 0.3582  | 0.06701 | 9.69E-08 | 89 | -0.01181 | 0.2859 | 0.9672   |
| ++++++++  | 2960 | 0.355   | 0.06676 | 1.13E-07 | 89 | 0.07907  | 0.2731 | 0.773    |
| ++++++++  | 2960 | 0.355   | 0.06676 | 1.13E-07 | 89 | 0.07907  | 0.2731 | 0.773    |
| ++++++++  | 2960 | 0.355   | 0.06676 | 1.13E-07 | 89 | 0.07907  | 0.2731 | 0.773    |
| ++++++++  | 2960 | 0.3501  | 0.0667  | 1.63E-07 | 89 | 0.07329  | 0.2832 | 0.7965   |
| ++++++++  | 2960 | 0.3501  | 0.0667  | 1.63E-07 | 89 | 0.07329  | 0.2832 | 0.7965   |
| ++-----+  | 2960 | 0.5433  | 0.1128  | 1.54E-06 | 89 | 2.259    | 0.7514 | 0.003506 |
| ++-----+  | 2960 | 0.5341  | 0.112   | 1.96E-06 | 89 | 2.259    | 0.7514 | 0.003506 |
| ++++++++  | 2960 | 0.3346  | 0.06797 | 8.97E-07 | 89 | 0.1184   | 0.2411 | 0.6245   |
| +-----+   | 2960 | 0.3479  | 0.06672 | 1.97E-07 | 89 | -0.01181 | 0.2859 | 0.9672   |
| ++-----+  | 2960 | 0.5558  | 0.1146  | 1.29E-06 | 89 | 2.259    | 0.7514 | 0.003506 |
| ++-----+  | 2960 | 0.5282  | 0.1119  | 2.45E-06 | 89 | 2.259    | 0.7514 | 0.003506 |
| ++++++++  | 2960 | 0.331   | 0.06806 | 1.21E-06 | 89 | 0.1792   | 0.3508 | 0.6109   |
| ++++++++  | 2960 | 0.3318  | 0.06807 | 1.15E-06 | 89 | 0.04981  | 0.3579 | 0.8896   |
| ++++++++  | 2960 | 0.3339  | 0.06808 | 9.90E-07 | 89 | 0.07653  | 0.2947 | 0.7958   |
| ++-----+  | 2960 | 0.5267  | 0.1116  | 2.47E-06 | 89 | 2.259    | 0.7514 | 0.003506 |
| ++-----+  | 2960 | 0.5174  | 0.112   | 3.97E-06 | 89 | 2.259    | 0.7514 | 0.003506 |
| ++-----+  | 2960 | 0.5174  | 0.112   | 3.97E-06 | 89 | 2.259    | 0.7514 | 0.003506 |
| ++-----+  | 2960 | 0.5255  | 0.1116  | 2.61E-06 | 89 | 2.259    | 0.7514 | 0.003506 |
| ++++++++  | 2960 | 0.3321  | 0.06804 | 1.11E-06 | 89 | 0.0248   | 0.2742 | 0.9282   |
| +-----+   | 2960 | 0.3301  | 0.06807 | 1.30E-06 | 89 | -0.1738  | 0.2697 | 0.521    |
| ++-----+  | 2960 | 0.5034  | 0.1123  | 7.69E-06 | 89 | 2.259    | 0.7514 | 0.003506 |
| +-----+   | 2960 | 0.3289  | 0.06806 | 1.41E-06 | 89 | -0.1738  | 0.2697 | 0.521    |
| ++++++++  | 2960 | 0.315   | 0.06798 | 3.76E-06 | 89 | 0.04981  | 0.3579 | 0.8896   |
| +-----+   | 2960 | 0.3229  | 0.0677  | 1.94E-06 | 89 | -0.09562 | 0.2693 | 0.7235   |
| -----     | 2960 | -0.3332 | 0.06968 | 1.83E-06 | 89 | -0.1786  | 0.2411 | 0.4609   |
| -----     | 2960 | -0.3314 | 0.06995 | 2.27E-06 | 89 | -0.2256  | 0.2496 | 0.3688   |
| -+--+---  | 2960 | -0.301  | 0.06449 | 3.19E-06 | 89 | -0.1182  | 0.3053 | 0.6997   |
| -----     | 2960 | -0.3261 | 0.07019 | 3.53E-06 | 89 | -0.2256  | 0.2496 | 0.3688   |
| -----     | 2960 | -0.3242 | 0.07019 | 4.03E-06 | 89 | -0.2577  | 0.2483 | 0.3024   |
| -----     | 2960 | -0.3421 | 0.07014 | 1.14E-06 | 89 | -0.1155  | 0.299  | 0.7002   |
| -----     | 2960 | -0.3242 | 0.07019 | 4.03E-06 | 89 | -0.2256  | 0.2496 | 0.3688   |
| ++---++   | 2960 | 0.2929  | 0.06598 | 9.37E-06 | 89 | 0.04094  | 0.2563 | 0.8735   |
| +-----+   | 2960 | 0.3087  | 0.06795 | 5.77E-06 | 89 | -0.1738  | 0.2697 | 0.521    |
| ++++-++++ | 2960 | 0.2498  | 0.06331 | 8.17E-05 | 89 | 0.3321   | 0.2485 | 0.1851   |
| ++++-++++ | 2960 | 0.2498  | 0.06331 | 8.17E-05 | 89 | 0.3321   | 0.2485 | 0.1851   |
| ++++-++++ | 2960 | 0.2499  | 0.06333 | 8.14E-05 | 89 | 0.3321   | 0.2485 | 0.1851   |
| ++++-++++ | 2960 | 0.2463  | 0.06336 | 0.000103 | 89 | 0.3321   | 0.2485 | 0.1851   |
| ++++-++++ | 2960 | 0.2444  | 0.06338 | 0.000117 | 89 | 0.351    | 0.2505 | 0.165    |
| ++++-++++ | 2960 | 0.2452  | 0.0634  | 0.000112 | 89 | 0.3321   | 0.2485 | 0.1851   |
| ++++-++++ | 2960 | 0.2347  | 0.0634  | 0.000218 | 89 | 0.5541   | 0.2525 | 0.03105  |
| ++++++++  | 2960 | 0.2889  | 0.06653 | 1.46E-05 | 89 | 0.1235   | 0.2485 | 0.6206   |

|            |      |         |         |          |    |          |        |          |
|------------|------|---------|---------|----------|----|----------|--------|----------|
| +++++----- | 2960 | 0.2444  | 0.06338 | 0.000117 | 89 | 0.3321   | 0.2485 | 0.1851   |
| +++++----- | 2960 | 0.2444  | 0.06338 | 0.000117 | 89 | 0.3321   | 0.2485 | 0.1851   |
| +++-----   | 2960 | 0.2503  | 0.06326 | 7.80E-05 | 89 | 0.3044   | 0.2463 | 0.22     |
| +++++----- | 2960 | 0.5037  | 0.1418  | 0.000387 | 89 | 0.8706   | 0.2211 | 0.000172 |
| -----      | 2960 | -0.3077 | 0.06944 | 9.73E-06 | 89 | -0.1807  | 0.2302 | 0.4348   |
| +++++----- | 2960 | 0.2447  | 0.06328 | 0.000113 | 89 | 0.3321   | 0.2485 | 0.1851   |
| +++++----- | 2960 | 0.2473  | 0.06322 | 9.36E-05 | 89 | 0.2683   | 0.2494 | 0.285    |
| --+-----   | 2960 | -0.2942 | 0.06443 | 5.17E-06 | 89 | 0.5847   | 0.3158 | 0.06768  |
| +++++----- | 2960 | 0.456   | 0.1123  | 5.00E-05 | 89 | 1.517    | 0.7043 | 0.03416  |
| +++++----- | 2960 | 0.283   | 0.06673 | 2.29E-05 | 89 | 0.08902  | 0.249  | 0.7217   |
| -----      | 2960 | -0.3062 | 0.06943 | 1.07E-05 | 89 | -0.1278  | 0.2336 | 0.5857   |
| +++++----- | 2960 | 0.4951  | 0.1113  | 9.02E-06 | 89 | 0.2191   | 0.2643 | 0.4095   |
| +++++----- | 2960 | 0.5137  | 0.1118  | 4.54E-06 | 89 | 0.02706  | 0.2493 | 0.9138   |
| -+-----    | 2960 | -0.2778 | 0.06463 | 1.77E-05 | 89 | -0.1182  | 0.3053 | 0.6997   |
| +++++----- | 2960 | 0.2508  | 0.06326 | 7.51E-05 | 89 | 0.1283   | 0.2501 | 0.6092   |
| +++++----- | 2960 | 0.3336  | 0.07206 | 3.82E-06 | 89 | 0.3456   | 0.3122 | 0.2715   |
| +++++----- | 2960 | 0.3181  | 0.07595 | 2.90E-05 | 89 | 0.447    | 0.2222 | 0.04753  |
| +++++----- | 2960 | 0.522   | 0.1417  | 0.000235 | 89 | 0.7232   | 0.2177 | 0.001336 |
| +++++----- | 2960 | 0.337   | 0.07206 | 3.05E-06 | 89 | 0.177    | 0.3369 | 0.6008   |
| -+-----    | 2960 | -0.2685 | 0.06463 | 3.35E-05 | 89 | -0.1228  | 0.3066 | 0.6899   |
| --+-----   | 2960 | -0.2797 | 0.06416 | 1.35E-05 | 89 | 0.6708   | 0.3374 | 0.05015  |
| -----+     | 2960 | 0.2343  | 0.06397 | 0.000253 | 89 | -0.1023  | 0.2827 | 0.7184   |
| -+-----    | 2960 | -0.324  | 0.07112 | 5.45E-06 | 89 | 0.2508   | 0.3521 | 0.4784   |
| -----+     | 2960 | -0.7713 | 0.1956  | 8.20E-05 | 89 | -0.1034  | 1.539  | 0.9466   |
| -----+     | 2960 | -0.2254 | 0.06584 | 0.000629 | 89 | -0.2114  | 0.2386 | 0.3782   |
| +++++----- | 2960 | 0.353   | 0.101   | 0.000483 | 89 | 0.3821   | 0.2475 | 0.1264   |
| +++++----- | 2960 | 0.2628  | 0.06862 | 0.000131 | 89 | 0.349    | 0.2217 | 0.1192   |
| -----+     | 2960 | 0.2339  | 0.06396 | 0.000259 | 89 | -0.1023  | 0.2827 | 0.7184   |
| -----      | 2960 | -0.6087 | 0.1669  | 0.000269 | 89 | -0.348   | 0.8753 | 0.692    |
| -----+     | 2960 | -0.2229 | 0.06585 | 0.00072  | 89 | -0.2114  | 0.2386 | 0.3782   |
| +++++----- | 2960 | 0.3528  | 0.0787  | 7.62E-06 | 89 | 0.1765   | 0.253  | 0.4873   |
| +++++----- | 2960 | 0.4073  | 0.1546  | 0.008462 | 89 | 0.952    | 0.2471 | 0.00023  |
| -+-----    | 2960 | -0.2682 | 0.06443 | 3.24E-05 | 89 | -0.02548 | 0.3122 | 0.9352   |
| +++++----- | 2960 | 0.4268  | 0.1554  | 0.006049 | 89 | 1.041    | 0.2802 | 0.00037  |
| +++++----- | 2960 | 0.3094  | 0.07599 | 4.79E-05 | 89 | 0.3124   | 0.2222 | 0.1635   |
| +++++----- | 2960 | 0.3094  | 0.07599 | 4.79E-05 | 89 | 0.3124   | 0.2222 | 0.1635   |
| +++++----- | 2960 | 0.3094  | 0.07599 | 4.79E-05 | 89 | 0.3124   | 0.2222 | 0.1635   |
| +++++----- | 2960 | 0.3094  | 0.07599 | 4.79E-05 | 89 | 0.3124   | 0.2222 | 0.1635   |
| +++++----- | 2960 | 0.3094  | 0.07599 | 4.79E-05 | 89 | 0.3124   | 0.2222 | 0.1635   |
| +++++----- | 2960 | 0.3094  | 0.07599 | 4.79E-05 | 89 | 0.3124   | 0.2222 | 0.1635   |
| +++++----- | 2960 | 0.3094  | 0.07599 | 4.79E-05 | 89 | 0.3124   | 0.2222 | 0.1635   |
| +++++----- | 2960 | 0.3094  | 0.07599 | 4.79E-05 | 89 | 0.3124   | 0.2222 | 0.1635   |
| +++++----- | 2960 | 0.3094  | 0.07599 | 4.79E-05 | 89 | 0.3124   | 0.2222 | 0.1635   |
| +++++----- | 2960 | 0.4268  | 0.1554  | 0.006049 | 89 | 1.041    | 0.2802 | 0.00037  |
| +++++----- | 2960 | 0.3139  | 0.07578 | 3.54E-05 | 89 | -0.1981  | 0.2163 | 0.3624   |
| +++++----- | 2960 | 0.4082  | 0.1539  | 0.008024 | 89 | 0.9041   | 0.2502 | 0.000521 |
| +++++----- | 2960 | 0.3118  | 0.07576 | 3.96E-05 | 89 | -0.1981  | 0.2163 | 0.3624   |
| -----      | 2960 | -0.227  | 0.06465 | 0.000452 | 89 | -0.04504 | 0.243  | 0.8534   |

|          |      |         |         |          |    |          |        |          |
|----------|------|---------|---------|----------|----|----------|--------|----------|
| ++++++   | 2960 | 0.4115  | 0.1529  | 0.007145 | 89 | 0.8366   | 0.2302 | 0.000485 |
| -----+   | 2960 | -0.4569 | 0.1172  | 9.89E-05 | 89 | -0.6988  | 0.3884 | 0.07565  |
| ++++++   | 2960 | 0.4268  | 0.1554  | 0.006049 | 89 | 1.041    | 0.2802 | 0.00037  |
| ++++++   | 2960 | 0.4268  | 0.1554  | 0.006049 | 89 | 1.041    | 0.2802 | 0.00037  |
| ++++++   | 2960 | 0.4268  | 0.1554  | 0.006049 | 89 | 1.041    | 0.2802 | 0.00037  |
| --+---   | 2960 | -0.248  | 0.06537 | 0.000152 | 89 | 0.7308   | 0.2278 | 0.001908 |
| ++++++   | 2960 | 0.4268  | 0.1554  | 0.006049 | 89 | 1.041    | 0.2802 | 0.00037  |
| ++++++   | 2960 | 0.4268  | 0.1554  | 0.006049 | 89 | 1.041    | 0.2802 | 0.00037  |
| ++++++   | 2960 | 0.377   | 0.0874  | 1.66E-05 | 89 | 0.6171   | 0.7507 | 0.4135   |
| ++++--   | 2960 | 0.2324  | 0.064   | 0.000288 | 89 | 0.4071   | 0.2351 | 0.08707  |
| ++++++   | 2960 | 0.3954  | 0.1538  | 0.01022  | 89 | 0.8439   | 0.2342 | 0.000537 |
| ++++++   | 2960 | 0.377   | 0.0874  | 1.66E-05 | 89 | 0.741    | 0.8659 | 0.3946   |
| --+----- | 2960 | -0.2608 | 0.07033 | 0.000213 | 89 | -0.08496 | 0.3057 | 0.7818   |
| ++++++   | 2960 | 0.3824  | 0.08734 | 1.24E-05 | 89 | 0.1736   | 0.2822 | 0.5402   |
| -----+-  | 2960 | -0.3918 | 0.119   | 0.001005 | 89 | -0.499   | 0.3784 | 0.1909   |
| ++++-+   | 2960 | 0.2588  | 0.06635 | 9.79E-05 | 89 | -0.2567  | 0.2852 | 0.3708   |
| ++++++   | 2960 | 0.407   | 0.1556  | 0.00896  | 89 | 1.041    | 0.2802 | 0.00037  |
| ++++--   | 2960 | 0.2338  | 0.06398 | 0.000263 | 89 | 0.3674   | 0.2342 | 0.1206   |
| ++++--   | 2960 | 0.2338  | 0.06398 | 0.000263 | 89 | 0.3674   | 0.2342 | 0.1206   |
| ++++++   | 2960 | 0.4078  | 0.1549  | 0.008498 | 89 | 1.041    | 0.2802 | 0.00037  |
| ++++++   | 2960 | 0.4078  | 0.1549  | 0.008498 | 89 | 1.041    | 0.2802 | 0.00037  |
| ++++-+   | 2960 | 0.3136  | 0.07146 | 1.18E-05 | 89 | 0.00621  | 0.3218 | 0.9846   |
| ++++--   | 2960 | 0.2321  | 0.06415 | 0.000303 | 89 | 0.4046   | 0.2398 | 0.09528  |
| ++++++   | 2960 | 0.407   | 0.1556  | 0.00896  | 89 | 1.041    | 0.2802 | 0.00037  |
| ++++--   | 2960 | 0.2315  | 0.06396 | 0.000301 | 89 | 0.3674   | 0.2342 | 0.1206   |

quisition.

| A4 Hispanic (Florbetapir) |          |        |          | ADNI (Florbetapir) |         |        |          | ADNI |          |
|---------------------------|----------|--------|----------|--------------------|---------|--------|----------|------|----------|
| N                         | BETA     | SE     | P        | N                  | BETA    | SE     | P        | N    | BETA     |
| 105                       | 4.041    | 0.9046 | 2.12E-05 | 623                | 2.17    | 0.206  | 5.68E-24 | 88   | 1.802    |
| 105                       | 1.588    | 0.8428 | 0.06245  | 623                | 1.875   | 0.2033 | 4.46E-19 | 88   | 1.604    |
| 105                       | 3.704    | 0.9352 | 0.000142 | 623                | 2.013   | 0.226  | 5.91E-18 | 88   | 1.51     |
| 105                       | 1.461    | 0.8003 | 0.07095  | 623                | 1.816   | 0.2033 | 4.81E-18 | 88   | 1.411    |
| 105                       | 3.953    | 0.9509 | 6.91E-05 | 623                | 2.013   | 0.226  | 5.91E-18 | 88   | 1.51     |
| 105                       | 3.704    | 0.9352 | 0.000142 | 623                | 2.013   | 0.226  | 5.91E-18 | 88   | 1.51     |
| 105                       | 1.325    | 0.7753 | 0.09051  | 623                | 1.812   | 0.2034 | 5.85E-18 | 88   | 1.411    |
| 105                       | 1.272    | 0.7298 | 0.08441  | 623                | 1.809   | 0.2033 | 6.27E-18 | 88   | 1.411    |
| 105                       | 4.224    | 0.9422 | 2.00E-05 | 623                | 1.939   | 0.2266 | 9.35E-17 | 88   | 1.51     |
| 105                       | 1.397    | 0.7524 | 0.06646  | 623                | 1.789   | 0.2037 | 1.58E-17 | 88   | 1.411    |
| 105                       | 4.224    | 0.9422 | 2.00E-05 | 623                | 1.989   | 0.2254 | 1.15E-17 | 88   | 1.522    |
| 105                       | 4.224    | 0.9422 | 2.00E-05 | 623                | 1.989   | 0.2254 | 1.15E-17 | 88   | 1.522    |
| 105                       | 4.224    | 0.9422 | 2.00E-05 | 623                | 1.909   | 0.226  | 2.15E-16 | 88   | 1.522    |
| 105                       | 3.993    | 1.199  | 0.00122  | 623                | 1.741   | 0.2554 | 2.24E-11 | 88   | 1.491    |
| 105                       | -0.7426  | 0.6425 | 0.2506   | 623                | -1.013  | 0.1964 | 3.36E-07 | 88   | -1.397   |
| 105                       | -0.5988  | 0.6556 | 0.3633   | 623                | -0.8722 | 0.1975 | 1.19E-05 | 88   | -0.5407  |
| 105                       | -0.5988  | 0.6556 | 0.3633   | 623                | -0.8722 | 0.1975 | 1.19E-05 | 88   | -0.5407  |
| 105                       | -0.5988  | 0.6556 | 0.3633   | 623                | -0.8722 | 0.1975 | 1.19E-05 | 88   | -0.5407  |
| 105                       | -0.5988  | 0.6556 | 0.3633   | 623                | -0.8722 | 0.1975 | 1.19E-05 | 88   | -0.5407  |
| 105                       | -0.5988  | 0.6556 | 0.3633   | 623                | -0.8722 | 0.1975 | 1.19E-05 | 88   | -0.5407  |
| 105                       | -0.8701  | 0.642  | 0.1784   | 623                | -0.9168 | 0.197  | 3.98E-06 | 88   | -0.5407  |
| 105                       | -0.4936  | 0.5873 | 0.4027   | 623                | -0.903  | 0.1953 | 4.61E-06 | 88   | -1.255   |
| 105                       | -0.4419  | 0.6686 | 0.5101   | 623                | -0.7813 | 0.1998 | 0.000103 | 88   | -0.2231  |
| 105                       | 0.06628  | 0.6919 | 0.9239   | 623                | -0.7243 | 0.2    | 0.000316 | 88   | -0.3722  |
| 105                       | 0.06628  | 0.6919 | 0.9239   | 623                | -0.7243 | 0.2    | 0.000316 | 88   | -0.3722  |
| 105                       | 0.04412  | 0.6942 | 0.9495   | 623                | -0.7474 | 0.2    | 0.000204 | 88   | -0.3722  |
| 105                       | -0.4893  | 0.7253 | 0.5015   | 623                | -0.8178 | 0.2141 | 0.000147 | 88   | -1.235   |
| 105                       | -0.04003 | 0.689  | 0.9538   | 623                | -0.6871 | 0.1998 | 0.000623 | 88   | -0.3722  |
| 105                       | -0.7445  | 0.6132 | 0.2276   | 623                | -0.5765 | 0.1914 | 0.002701 | 88   | -0.127   |
| 105                       | -0.03463 | 0.6414 | 0.9571   | 623                | -0.5641 | 0.1891 | 0.002972 | 88   | -1.433   |
| 105                       | 0.8423   | 0.6897 | 0.2249   | 623                | 0.9432  | 0.1847 | 4.38E-07 | 88   | -0.06286 |
| 105                       | -0.03463 | 0.6414 | 0.9571   | 623                | -0.5641 | 0.1891 | 0.002972 | 88   | -1.433   |
| 105                       | 0.6302   | 0.6798 | 0.3562   | 623                | 0.3528  | 0.2057 | 0.08692  | 88   | 1.545    |
| 105                       | 0.5155   | 0.6725 | 0.4452   | 623                | 0.3528  | 0.2057 | 0.08692  | 88   | 1.53     |
| 105                       | 0.5155   | 0.6725 | 0.4452   | 623                | 0.3698  | 0.2065 | 0.07374  | 88   | 1.53     |
| 105                       | 0.6302   | 0.6798 | 0.3562   | 623                | 0.3223  | 0.206  | 0.1183   | 88   | 1.476    |
| 105                       | 0.5115   | 0.6586 | 0.4392   | 623                | 0.2558  | 0.2015 | 0.2049   | 88   | 1.416    |
| 105                       | -0.273   | 0.7338 | 0.7107   | 623                | -0.6525 | 0.197  | 0.000981 | 88   | -0.03435 |
| 105                       | 0.6302   | 0.6798 | 0.3562   | 623                | 0.3185  | 0.2053 | 0.1212   | 88   | 1.42     |
| 105                       | 0.6302   | 0.6798 | 0.3562   | 623                | 0.2702  | 0.2056 | 0.1894   | 88   | 1.323    |
| 105                       | -0.1901  | 0.7278 | 0.7945   | 623                | -0.5696 | 0.2008 | 0.004715 | 88   | 0.01372  |

|     |         |        |        |     |          |        |          |    |          |
|-----|---------|--------|--------|-----|----------|--------|----------|----|----------|
| 105 | 0.6088  | 0.6328 | 0.3384 | 623 | 0.2403   | 0.1953 | 0.2191   | 88 | 1.353    |
| 105 | 0.6088  | 0.6328 | 0.3384 | 623 | 0.2403   | 0.1953 | 0.2191   | 88 | 1.353    |
| 105 | 0.7731  | 0.6573 | 0.2424 | 623 | 0.3659   | 0.199  | 0.06649  | 88 | 1.397    |
| 105 | 0.7949  | 0.653  | 0.2265 | 623 | 0.3659   | 0.199  | 0.06649  | 88 | 1.397    |
| 105 | -1.571  | 1.133  | 0.1685 | 623 | 0.3531   | 0.3445 | 0.3059   | 88 | 0.5121   |
| 105 | 0.5667  | 0.6391 | 0.3774 | 623 | 0.2426   | 0.1953 | 0.2146   | 88 | 1.353    |
| 105 | 0.477   | 0.6302 | 0.4509 | 623 | 0.2246   | 0.1949 | 0.2497   | 88 | 1.353    |
| 105 | 0.477   | 0.6302 | 0.4509 | 623 | 0.2246   | 0.1949 | 0.2497   | 88 | 1.353    |
| 105 | 0.477   | 0.6302 | 0.4509 | 623 | 0.2246   | 0.1949 | 0.2497   | 88 | 1.353    |
| 105 | 0.477   | 0.6302 | 0.4509 | 623 | 0.2269   | 0.1949 | 0.2448   | 88 | 1.353    |
| 105 | 0.477   | 0.6302 | 0.4509 | 623 | 0.2269   | 0.1949 | 0.2448   | 88 | 1.353    |
| 105 | -1.094  | 1.114  | 0.3286 | 623 | 0.3984   | 0.3434 | 0.2465   | 88 | 0.5121   |
| 105 | -1.301  | 1.088  | 0.2346 | 623 | 0.4151   | 0.3421 | 0.2255   | 88 | 0.5121   |
| 105 | 0.8571  | 0.6414 | 0.1846 | 623 | 0.2845   | 0.1997 | 0.1549   | 88 | 1.358    |
| 105 | 0.4966  | 0.6364 | 0.4371 | 623 | 0.2269   | 0.1949 | 0.2448   | 88 | 1.353    |
| 105 | -1.301  | 1.088  | 0.2346 | 623 | 0.4385   | 0.3557 | 0.2181   | 88 | 0.04839  |
| 105 | -1.301  | 1.088  | 0.2346 | 623 | 0.4151   | 0.3421 | 0.2255   | 88 | 0.5121   |
| 105 | 0.7358  | 0.6547 | 0.2638 | 623 | 0.2797   | 0.2002 | 0.1628   | 88 | 1.358    |
| 105 | 0.6967  | 0.6516 | 0.2876 | 623 | 0.2957   | 0.2003 | 0.1404   | 88 | 1.491    |
| 105 | 0.7358  | 0.6547 | 0.2638 | 623 | 0.2797   | 0.2002 | 0.1628   | 88 | 1.358    |
| 105 | -1.271  | 1.11   | 0.2551 | 623 | 0.4149   | 0.3421 | 0.2257   | 88 | 0.5121   |
| 105 | -1.301  | 1.088  | 0.2346 | 623 | 0.4151   | 0.3421 | 0.2255   | 88 | 0.5121   |
| 105 | -1.301  | 1.088  | 0.2346 | 623 | 0.4151   | 0.3421 | 0.2255   | 88 | 0.5121   |
| 105 | -1.301  | 1.088  | 0.2346 | 623 | 0.4149   | 0.3421 | 0.2257   | 88 | 0.5121   |
| 105 | 0.7358  | 0.6547 | 0.2638 | 623 | 0.2797   | 0.2002 | 0.1628   | 88 | 1.358    |
| 105 | 0.8571  | 0.6414 | 0.1846 | 623 | 0.2957   | 0.2003 | 0.1404   | 88 | 1.563    |
| 105 | -1.571  | 1.133  | 0.1685 | 623 | 0.3706   | 0.3433 | 0.2807   | 88 | 0.5121   |
| 105 | 0.8571  | 0.6414 | 0.1846 | 623 | 0.2797   | 0.2002 | 0.1628   | 88 | 1.491    |
| 105 | 0.6365  | 0.6455 | 0.3265 | 623 | 0.2245   | 0.2005 | 0.2634   | 88 | 1.585    |
| 105 | 0.7572  | 0.6328 | 0.2344 | 623 | 0.1984   | 0.1994 | 0.32     | 88 | 1.585    |
| 105 | -0.7187 | 0.7251 | 0.324  | 623 | -0.1482  | 0.2188 | 0.4984   | 88 | -0.5915  |
| 105 | -0.7187 | 0.7251 | 0.324  | 623 | -0.1232  | 0.2185 | 0.5731   | 88 | -0.5573  |
| 105 | 0.7634  | 0.6376 | 0.2341 | 623 | -0.474   | 0.1976 | 0.01676  | 88 | 0.03318  |
| 105 | -0.7187 | 0.7251 | 0.324  | 623 | -0.1232  | 0.2185 | 0.5731   | 88 | -0.5573  |
| 105 | -0.7187 | 0.7251 | 0.324  | 623 | -0.1232  | 0.2185 | 0.5731   | 88 | -0.4872  |
| 105 | -0.83   | 0.7521 | 0.2724 | 623 | -0.07931 | 0.2116 | 0.708    | 88 | -0.5328  |
| 105 | -0.7187 | 0.7251 | 0.324  | 623 | -0.1232  | 0.2185 | 0.5731   | 88 | -0.5573  |
| 105 | -0.5196 | 0.6807 | 0.4471 | 623 | 0.5728   | 0.1933 | 0.003155 | 88 | 0.09659  |
| 105 | 0.7572  | 0.6328 | 0.2344 | 623 | 0.2245   | 0.2005 | 0.2634   | 88 | 1.585    |
| 105 | -0.2915 | 0.6401 | 0.6498 | 623 | 0.4413   | 0.1921 | 0.02193  | 88 | -0.07005 |
| 105 | -0.2915 | 0.6401 | 0.6498 | 623 | 0.4413   | 0.1921 | 0.02193  | 88 | -0.07005 |
| 105 | -0.2915 | 0.6401 | 0.6498 | 623 | 0.4413   | 0.1921 | 0.02193  | 88 | -0.1271  |
| 105 | -0.2953 | 0.6409 | 0.646  | 623 | 0.4582   | 0.1912 | 0.01683  | 88 | -0.1271  |
| 105 | -0.2915 | 0.6401 | 0.6498 | 623 | 0.4657   | 0.1909 | 0.01498  | 88 | -0.1271  |
| 105 | -0.2953 | 0.6409 | 0.646  | 623 | 0.4657   | 0.1909 | 0.01498  | 88 | -0.1271  |
| 105 | -0.3244 | 0.6472 | 0.6173 | 623 | 0.4194   | 0.1924 | 0.02967  | 88 | -0.08092 |
| 105 | 0.4903  | 0.6623 | 0.4609 | 623 | 0.1911   | 0.1978 | 0.3344   | 88 | 1.223    |

|     |         |        |        |     |          |        |          |    |          |
|-----|---------|--------|--------|-----|----------|--------|----------|----|----------|
| 105 | -0.2915 | 0.6401 | 0.6498 | 623 | 0.4657   | 0.1909 | 0.01498  | 88 | -0.1271  |
| 105 | -0.2915 | 0.6401 | 0.6498 | 623 | 0.4657   | 0.1909 | 0.01498  | 88 | -0.1271  |
| 105 | 0.07759 | 0.6297 | 0.9022 | 623 | 0.4578   | 0.1924 | 0.01765  | 88 | -0.07005 |
| 105 | -1.017  | 1.012  | 0.3175 | 623 | 0.5439   | 0.4212 | 0.1971   | 88 | 1.539    |
| 105 | -0.7187 | 0.7251 | 0.324  | 623 | -0.1499  | 0.2175 | 0.491    | 88 | -0.5915  |
| 105 | -0.2915 | 0.6401 | 0.6498 | 623 | 0.4316   | 0.1918 | 0.02474  | 88 | -0.07005 |
| 105 | -0.2915 | 0.6401 | 0.6498 | 623 | 0.4463   | 0.1913 | 0.01999  | 88 | -0.07005 |
| 105 | 0.441   | 0.6089 | 0.4706 | 623 | -0.1266  | 0.1966 | 0.5198   | 88 | -0.2742  |
| 105 | -1.842  | 1.057  | 0.0847 | 623 | 0.4995   | 0.3329 | 0.134    | 88 | 0.9783   |
| 105 | 0.4903  | 0.6623 | 0.4609 | 623 | 0.2165   | 0.1989 | 0.2767   | 88 | 1.223    |
| 105 | -0.7187 | 0.7251 | 0.324  | 623 | -0.1499  | 0.2175 | 0.491    | 88 | -0.5573  |
| 105 | -1.606  | 1.022  | 0.1196 | 623 | 0.244    | 0.337  | 0.4693   | 88 | 0.5121   |
| 105 | -1.071  | 0.9949 | 0.2845 | 623 | 0.3984   | 0.3434 | 0.2465   | 88 | 0.5121   |
| 105 | 0.7353  | 0.6422 | 0.255  | 623 | -0.4515  | 0.1979 | 0.0229   | 88 | 0.02267  |
| 105 | 0.07759 | 0.6297 | 0.9022 | 623 | 0.4578   | 0.1924 | 0.01765  | 88 | -0.07005 |
| 105 | 0.2815  | 0.7481 | 0.7075 | 623 | 0.1719   | 0.2237 | 0.4425   | 88 | 0.7674   |
| 105 | 0.00231 | 0.692  | 0.9973 | 623 | 0.1448   | 0.224  | 0.5181   | 88 | 0.2541   |
| 105 | -1.017  | 1.012  | 0.3175 | 623 | 0.5439   | 0.4212 | 0.1971   | 88 | 1.539    |
| 105 | 0.2815  | 0.7481 | 0.7075 | 623 | 0.161    | 0.2238 | 0.4721   | 88 | 0.7674   |
| 105 | 0.7353  | 0.6422 | 0.255  | 623 | -0.4515  | 0.1979 | 0.0229   | 88 | 0.02267  |
| 105 | 0.5455  | 0.6026 | 0.3675 | 623 | -0.07905 | 0.1947 | 0.685    | 88 | -0.2742  |
| 105 | -0.2972 | 0.6428 | 0.6449 | 623 | 0.5233   | 0.189  | 0.005799 | 88 | 0.8574   |
| 105 | -0.8068 | 0.7743 | 0.3    | 623 | -0.08121 | 0.2165 | 0.7077   | 88 | -0.4888  |
| 105 | -1.242  | 3.276  | 0.7056 | 623 | -1.733   | 0.6508 | 0.007948 | 88 | -4.772   |
| 105 | 0.5749  | 0.696  | 0.4108 | 623 | -0.6837  | 0.189  | 0.000321 | 88 | 0.3108   |
| 105 | 1.122   | 0.7476 | 0.1365 | 623 | 0.6551   | 0.2905 | 0.02448  | 88 | 1.14     |
| 105 | 0.8448  | 0.6583 | 0.2024 | 623 | 0.3283   | 0.1979 | 0.09757  | 88 | 0.7682   |
| 105 | -0.2972 | 0.6428 | 0.6449 | 623 | 0.5233   | 0.189  | 0.005799 | 88 | 0.8574   |
| 105 | -0.2792 | 2.101  | 0.8946 | 623 | -1.187   | 0.5268 | 0.02458  | 88 | -2.374   |
| 105 | 0.5749  | 0.696  | 0.4108 | 623 | -0.6837  | 0.189  | 0.000321 | 88 | 0.3108   |
| 105 | 0.3537  | 0.8318 | 0.6716 | 623 | 0.2029   | 0.2443 | 0.4066   | 88 | 0.5303   |
| 105 | 0.0787  | 1.576  | 0.9603 | 623 | 0.3936   | 0.4674 | 0.4      | 88 | 0.2546   |
| 105 | 0.816   | 0.6469 | 0.2102 | 623 | -0.3955  | 0.1976 | 0.04584  | 88 | 0.2568   |
| 105 | 0.2425  | 1.674  | 0.8851 | 623 | 0.3697   | 0.4742 | 0.4359   | 88 | 0.4931   |
| 105 | -0.4    | 0.7034 | 0.5708 | 623 | 0.2613   | 0.2278 | 0.2519   | 88 | 1.227    |
| 105 | -0.4    | 0.7034 | 0.5708 | 623 | 0.2613   | 0.2278 | 0.2519   | 88 | 1.227    |
| 105 | -0.4    | 0.7034 | 0.5708 | 623 | 0.2613   | 0.2278 | 0.2519   | 88 | 1.227    |
| 105 | -0.4    | 0.7034 | 0.5708 | 623 | 0.2613   | 0.2278 | 0.2519   | 88 | 1.227    |
| 105 | -0.4    | 0.7034 | 0.5708 | 623 | 0.2613   | 0.2278 | 0.2519   | 88 | 1.227    |
| 105 | -0.4    | 0.7034 | 0.5708 | 623 | 0.2613   | 0.2278 | 0.2519   | 88 | 1.227    |
| 105 | -0.4    | 0.7034 | 0.5708 | 623 | 0.2613   | 0.2278 | 0.2519   | 88 | 1.227    |
| 105 | -0.4    | 0.7034 | 0.5708 | 623 | 0.2613   | 0.2278 | 0.2519   | 88 | 1.227    |
| 105 | 0.2425  | 1.674  | 0.8851 | 623 | 0.3697   | 0.4742 | 0.4359   | 88 | 0.4931   |
| 105 | -0.1783 | 0.7059 | 0.8011 | 623 | 0.2779   | 0.2278 | 0.2229   | 88 | 1.227    |
| 105 | 0.0787  | 1.576  | 0.9603 | 623 | 0.4322   | 0.4633 | 0.3512   | 88 | 0.2546   |
| 105 | -0.1783 | 0.7059 | 0.8011 | 623 | 0.2779   | 0.2278 | 0.2229   | 88 | 1.227    |
| 105 | 0.594   | 0.6631 | 0.3726 | 623 | -0.7671  | 0.19   | 6.06E-05 | 88 | 0.2423   |

|     |         |        |        |     |         |        |          |    |         |
|-----|---------|--------|--------|-----|---------|--------|----------|----|---------|
| 105 | -0.4171 | 1.446  | 0.7736 | 623 | 0.3234  | 0.4459 | 0.4686   | 88 | 0.2546  |
| 105 | -0.4595 | 1.605  | 0.7753 | 623 | -0.4624 | 0.3393 | 0.1735   | 88 | -0.5559 |
| 105 | 0.2425  | 1.674  | 0.8851 | 623 | 0.3697  | 0.4742 | 0.4359   | 88 | 0.4931  |
| 105 | 0.2425  | 1.674  | 0.8851 | 623 | 0.3697  | 0.4742 | 0.4359   | 88 | 0.4931  |
| 105 | 0.2425  | 1.674  | 0.8851 | 623 | 0.3697  | 0.4742 | 0.4359   | 88 | 0.4931  |
| 105 | 0.341   | 0.6197 | 0.5835 | 623 | -0.0957 | 0.2015 | 0.635    | 88 | -0.1574 |
| 105 | 0.2425  | 1.674  | 0.8851 | 623 | 0.3697  | 0.4742 | 0.4359   | 88 | 0.4931  |
| 105 | 0.2425  | 1.674  | 0.8851 | 623 | 0.3697  | 0.4742 | 0.4359   | 88 | 0.4931  |
| 105 | -0.5696 | 0.9861 | 0.5648 | 623 | 0.04713 | 0.2655 | 0.8592   | 88 | 1.473   |
| 105 | -0.3874 | 0.7589 | 0.6109 | 623 | 0.1666  | 0.1887 | 0.3776   | 88 | 1.419   |
| 105 | 0.0787  | 1.576  | 0.9603 | 623 | 0.3936  | 0.4674 | 0.4      | 88 | 0.2546  |
| 105 | -0.6072 | 0.9356 | 0.5179 | 623 | 0.04713 | 0.2655 | 0.8592   | 88 | 1.473   |
| 105 | 0.1476  | 0.7099 | 0.8357 | 623 | -0.3307 | 0.199  | 0.09708  | 88 | -1.165  |
| 105 | -0.7159 | 0.9262 | 0.4414 | 623 | 0.04713 | 0.2655 | 0.8592   | 88 | 1.489   |
| 105 | -1.292  | 1.418  | 0.3645 | 623 | -0.9975 | 0.3505 | 0.004577 | 88 | -1.186  |
| 105 | 0.08463 | 0.7409 | 0.9093 | 623 | 0.5361  | 0.1946 | 0.006046 | 88 | 0.04443 |
| 105 | 0.2425  | 1.674  | 0.8851 | 623 | 0.3697  | 0.4742 | 0.4359   | 88 | 0.4931  |
| 105 | -0.3874 | 0.7589 | 0.6109 | 623 | 0.1666  | 0.1887 | 0.3776   | 88 | 1.419   |
| 105 | -0.3874 | 0.7589 | 0.6109 | 623 | 0.1666  | 0.1887 | 0.3776   | 88 | 1.419   |
| 105 | 0.2425  | 1.674  | 0.8851 | 623 | 0.3697  | 0.4742 | 0.4359   | 88 | 0.4931  |
| 105 | 0.2425  | 1.674  | 0.8851 | 623 | 0.3697  | 0.4742 | 0.4359   | 88 | 0.4931  |
| 105 | 0.4537  | 0.7268 | 0.5339 | 623 | 0.2501  | 0.2143 | 0.2438   | 88 | 1.141   |
| 105 | -0.2561 | 0.7774 | 0.7426 | 623 | 0.1666  | 0.1887 | 0.3776   | 88 | 1.419   |
| 105 | 0.2425  | 1.674  | 0.8851 | 623 | 0.3697  | 0.4742 | 0.4359   | 88 | 0.4931  |
| 105 | -0.3874 | 0.7589 | 0.6109 | 623 | 0.1583  | 0.1882 | 0.4005   | 88 | 1.551   |

| (PiB)  |          | Berkeley (PiB) |         |        |          | BIOCARD (PiB) |        |       |          |
|--------|----------|----------------|---------|--------|----------|---------------|--------|-------|----------|
| SE     | P        | N              | BETA    | SE     | P        | N             | BETA   | SE    | P        |
| 0.4832 | 0.000354 | 172            | 2.177   | 0.6344 | 0.000756 | 44            | 3.733  | 0.995 | 0.000601 |
| 0.4496 | 0.000606 | 172            | 1.858   | 0.566  | 0.001254 | 44            | 3.394  | 1.032 | 0.002212 |
| 0.5645 | 0.009041 | 172            | 1.963   | 0.7009 | 0.005711 | 44            | 2.329  | 1.331 | 0.08836  |
| 0.4628 | 0.003098 | 172            | 1.84    | 0.5654 | 0.001379 | 44            | 3.394  | 1.032 | 0.002212 |
| 0.5645 | 0.009041 | 172            | 1.963   | 0.7009 | 0.005711 | 44            | 2.329  | 1.331 | 0.08836  |
| 0.5645 | 0.009041 | 172            | 1.963   | 0.7009 | 0.005711 | 44            | 2.329  | 1.331 | 0.08836  |
| 0.4628 | 0.003098 | 172            | 1.625   | 0.5555 | 0.003927 | 44            | 3.394  | 1.032 | 0.002212 |
| 0.4628 | 0.003098 | 172            | 1.625   | 0.5555 | 0.003927 | 44            | 3.394  | 1.032 | 0.002212 |
| 0.5645 | 0.009041 | 172            | 1.73    | 0.7111 | 0.01605  | 44            | 2.329  | 1.331 | 0.08836  |
| 0.4628 | 0.003098 | 172            | 1.625   | 0.5555 | 0.003927 | 44            | 3.394  | 1.032 | 0.002212 |
| 0.5455 | 0.006573 | 172            | 1.72    | 0.7091 | 0.01639  | 44            | 2.329  | 1.331 | 0.08836  |
| 0.5455 | 0.006573 | 172            | 1.72    | 0.7091 | 0.01639  | 44            | 2.329  | 1.331 | 0.08836  |
| 0.5455 | 0.006573 | 172            | 1.633   | 0.7058 | 0.02189  | 44            | 2.329  | 1.331 | 0.08836  |
| 0.5985 | 0.0148   | 172            | 1.344   | 0.765  | 0.08074  | 44            | 1.538  | 1.434 | 0.2905   |
| 0.4583 | 0.003112 | 172            | -0.556  | 0.4594 | 0.228    | 44            | -1.965 | 1.043 | 0.06733  |
| 0.4992 | 0.282    | 172            | -0.7806 | 0.4644 | 0.09471  | 44            | -1.79  | 1.104 | 0.1134   |
| 0.4992 | 0.282    | 172            | -0.7806 | 0.4644 | 0.09471  | 44            | -1.79  | 1.104 | 0.1134   |
| 0.4992 | 0.282    | 172            | -0.7806 | 0.4644 | 0.09471  | 44            | -1.79  | 1.104 | 0.1134   |
| 0.4992 | 0.282    | 172            | -0.7806 | 0.4644 | 0.09471  | 44            | -1.79  | 1.104 | 0.1134   |
| 0.4992 | 0.282    | 172            | -0.7806 | 0.4644 | 0.09471  | 44            | -1.79  | 1.104 | 0.1134   |
| 0.4992 | 0.282    | 172            | -0.812  | 0.4632 | 0.0815   | 44            | -1.567 | 1.138 | 0.1767   |
| 0.4488 | 0.006471 | 172            | -0.4996 | 0.4383 | 0.2559   | 44            | -1.397 | 1.241 | 0.2675   |
| 0.4851 | 0.6469   | 172            | -0.8647 | 0.4477 | 0.05517  | 44            | -1.623 | 1.181 | 0.1778   |
| 0.5031 | 0.4615   | 172            | -0.845  | 0.4562 | 0.06575  | 44            | -1.623 | 1.181 | 0.1778   |
| 0.5031 | 0.4615   | 172            | -0.7225 | 0.4531 | 0.1127   | 44            | -1.623 | 1.181 | 0.1778   |
| 0.5031 | 0.4615   | 172            | -0.845  | 0.4562 | 0.06575  | 44            | -1.351 | 1.215 | 0.2733   |
| 0.4969 | 0.01501  | 172            | -0.429  | 0.4874 | 0.38     | 44            | 0.3593 | 1.545 | 0.8173   |
| 0.5031 | 0.4615   | 172            | -0.775  | 0.4555 | 0.09075  | 44            | -1.351 | 1.215 | 0.2733   |
| 0.4741 | 0.7894   | 172            | 0.5985  | 0.4365 | 0.1722   | 44            | 0.1601 | 1.258 | 0.8994   |
| 0.4925 | 0.004678 | 172            | -0.8108 | 0.4538 | 0.07582  | 44            | -1.177 | 1.094 | 0.2888   |
| 0.4756 | 0.8952   | 172            | 0.03954 | 0.4426 | 0.9289   | 44            | 1.309  | 1.07  | 0.2289   |
| 0.4925 | 0.004678 | 172            | -0.8108 | 0.4538 | 0.07582  | 44            | -1.177 | 1.094 | 0.2888   |
| 0.4841 | 0.002014 | 172            | 0.89    | 0.4645 | 0.05709  | 44            | 0.5088 | 1.251 | 0.6866   |
| 0.4968 | 0.002823 | 172            | 0.9121  | 0.4703 | 0.05414  | 44            | 0.5088 | 1.251 | 0.6866   |
| 0.4968 | 0.002823 | 172            | 0.9458  | 0.4701 | 0.04585  | 44            | 0.5088 | 1.251 | 0.6866   |
| 0.506  | 0.004573 | 172            | 0.89    | 0.4645 | 0.05709  | 44            | 0.5088 | 1.251 | 0.6866   |
| 0.4777 | 0.003974 | 172            | 0.9248  | 0.4601 | 0.04605  | 44            | 0.3148 | 1.195 | 0.7936   |
| 0.5042 | 0.9458   | 172            | -0.2828 | 0.4558 | 0.5358   | 44            | -1.435 | 1.144 | 0.2177   |
| 0.4747 | 0.003689 | 172            | 0.8949  | 0.4643 | 0.05563  | 44            | 0.3281 | 1.19  | 0.7844   |
| 0.4722 | 0.00635  | 172            | 0.8949  | 0.4643 | 0.05563  | 44            | 0.3281 | 1.19  | 0.7844   |
| 0.4956 | 0.978    | 172            | -0.5146 | 0.4618 | 0.2667   | 44            | -0.903 | 1.221 | 0.4644   |



|        |          |     |         |        |         |    |        |       |         |
|--------|----------|-----|---------|--------|---------|----|--------|-------|---------|
| 0.4911 | 0.007258 | 172 | 0.8065  | 0.4605 | 0.08172 | 44 | 1.903  | 1.169 | 0.1121  |
| 0.4911 | 0.007258 | 172 | 0.8065  | 0.4605 | 0.08172 | 44 | 1.903  | 1.169 | 0.1121  |
| 0.5204 | 0.008785 | 172 | 0.8998  | 0.4618 | 0.05305 | 44 | 1.903  | 1.169 | 0.1121  |
| 0.5204 | 0.008785 | 172 | 0.8998  | 0.4618 | 0.05305 | 44 | 1.903  | 1.169 | 0.1121  |
| 1.015  | 0.6154   | 172 | 1.681   | 0.7087 | 0.01887 | 44 | 2.468  | 1.803 | 0.1795  |
| 0.4911 | 0.007258 | 172 | 0.8091  | 0.4591 | 0.07989 | 44 | 1.903  | 1.169 | 0.1121  |
| 0.4911 | 0.007258 | 172 | 0.8291  | 0.4656 | 0.07676 | 44 | 1.903  | 1.169 | 0.1121  |
| 0.4911 | 0.007258 | 172 | 0.8291  | 0.4656 | 0.07676 | 44 | 1.903  | 1.169 | 0.1121  |
| 0.4911 | 0.007258 | 172 | 0.8291  | 0.4656 | 0.07676 | 44 | 1.903  | 1.169 | 0.1121  |
| 0.4911 | 0.007258 | 172 | 0.7886  | 0.4606 | 0.08877 | 44 | 1.903  | 1.169 | 0.1121  |
| 0.4911 | 0.007258 | 172 | 0.7886  | 0.4606 | 0.08877 | 44 | 1.903  | 1.169 | 0.1121  |
| 1.015  | 0.6154   | 172 | 1.683   | 0.7102 | 0.01893 | 44 | 2.468  | 1.803 | 0.1795  |
| 1.015  | 0.6154   | 172 | 1.683   | 0.7102 | 0.01893 | 44 | 2.468  | 1.803 | 0.1795  |
| 0.4938 | 0.007338 | 172 | 1.066   | 0.4743 | 0.02597 | 44 | 1.903  | 1.169 | 0.1121  |
| 0.4911 | 0.007258 | 172 | 0.7916  | 0.4594 | 0.08672 | 44 | 1.903  | 1.169 | 0.1121  |
| 1.107  | 0.9652   | 172 | 1.385   | 0.7529 | 0.06754 | 44 | 3.203  | 1.831 | 0.08846 |
| 1.015  | 0.6154   | 172 | 1.683   | 0.7102 | 0.01893 | 44 | 2.468  | 1.803 | 0.1795  |
| 0.4938 | 0.007338 | 172 | 0.9859  | 0.4759 | 0.03987 | 44 | 1.903  | 1.169 | 0.1121  |
| 0.5041 | 0.004046 | 172 | 0.9451  | 0.4707 | 0.04629 | 44 | 1.903  | 1.169 | 0.1121  |
| 0.4938 | 0.007338 | 172 | 0.9859  | 0.4759 | 0.03987 | 44 | 1.903  | 1.169 | 0.1121  |
| 1.015  | 0.6154   | 172 | 1.335   | 0.7471 | 0.07569 | 44 | 2.468  | 1.803 | 0.1795  |
| 1.015  | 0.6154   | 172 | 1.683   | 0.7102 | 0.01893 | 44 | 2.468  | 1.803 | 0.1795  |
| 1.015  | 0.6154   | 172 | 1.683   | 0.7102 | 0.01893 | 44 | 2.468  | 1.803 | 0.1795  |
| 1.015  | 0.6154   | 172 | 1.335   | 0.7471 | 0.07569 | 44 | 2.468  | 1.803 | 0.1795  |
| 0.4938 | 0.007338 | 172 | 0.9859  | 0.4759 | 0.03987 | 44 | 1.903  | 1.169 | 0.1121  |
| 0.5082 | 0.002875 | 172 | 0.9451  | 0.4707 | 0.04629 | 44 | 1.903  | 1.169 | 0.1121  |
| 1.015  | 0.6154   | 172 | 1.683   | 0.7102 | 0.01893 | 44 | 2.468  | 1.803 | 0.1795  |
| 0.5041 | 0.004046 | 172 | 0.9451  | 0.4707 | 0.04629 | 44 | 1.903  | 1.169 | 0.1121  |
| 0.491  | 0.001805 | 172 | 0.9699  | 0.4754 | 0.04295 | 44 | 1.903  | 1.169 | 0.1121  |
| 0.491  | 0.001805 | 172 | 1.054   | 0.4714 | 0.02665 | 44 | 1.903  | 1.169 | 0.1121  |
| 0.5267 | 0.2648   | 172 | -0.8676 | 0.474  | 0.06901 | 44 | -1.508 | 1.229 | 0.2276  |
| 0.5269 | 0.2934   | 172 | -0.8676 | 0.474  | 0.06901 | 44 | -1.508 | 1.229 | 0.2276  |
| 0.4831 | 0.9454   | 172 | -0.2937 | 0.4451 | 0.5102  | 44 | 0.189  | 1.141 | 0.8693  |
| 0.5269 | 0.2934   | 172 | -0.8487 | 0.474  | 0.07518 | 44 | -1.508 | 1.229 | 0.2276  |
| 0.5306 | 0.3612   | 172 | -0.8487 | 0.474  | 0.07518 | 44 | -1.508 | 1.229 | 0.2276  |
| 0.5213 | 0.3098   | 172 | -0.5863 | 0.4815 | 0.2251  | 44 | -1.387 | 1.366 | 0.3166  |
| 0.5269 | 0.2934   | 172 | -0.8487 | 0.474  | 0.07518 | 44 | -1.508 | 1.229 | 0.2276  |
| 0.4549 | 0.8324   | 172 | -0.3304 | 0.4727 | 0.4855  | 44 | 1.371  | 1.009 | 0.1823  |
| 0.491  | 0.001805 | 172 | 0.9544  | 0.4765 | 0.04683 | 44 | 1.483  | 1.143 | 0.2025  |
| 0.5179 | 0.8927   | 172 | 0.9314  | 0.4528 | 0.04127 | 44 | 1.479  | 1.082 | 0.1799  |
| 0.5179 | 0.8927   | 172 | 0.9314  | 0.4528 | 0.04127 | 44 | 1.479  | 1.082 | 0.1799  |
| 0.5283 | 0.8105   | 172 | 0.9314  | 0.4528 | 0.04127 | 44 | 1.479  | 1.082 | 0.1799  |
| 0.5283 | 0.8105   | 172 | 0.9314  | 0.4528 | 0.04127 | 44 | 1.479  | 1.082 | 0.1799  |
| 0.5283 | 0.8105   | 172 | 0.9314  | 0.4528 | 0.04127 | 44 | 1.479  | 1.082 | 0.1799  |
| 0.5283 | 0.8105   | 172 | 0.9314  | 0.4528 | 0.04127 | 44 | 1.479  | 1.082 | 0.1799  |
| 0.5233 | 0.8775   | 172 | 0.934   | 0.4478 | 0.03855 | 44 | 1.479  | 1.082 | 0.1799  |
| 0.4786 | 0.01251  | 172 | 1.065   | 0.4694 | 0.02457 | 44 | 1.596  | 1.066 | 0.1428  |

|        |         |     |         |        |         |    |         |        |         |
|--------|---------|-----|---------|--------|---------|----|---------|--------|---------|
| 0.5283 | 0.8105  | 172 | 0.9314  | 0.4528 | 0.04127 | 44 | 1.479   | 1.082  | 0.1799  |
| 0.5283 | 0.8105  | 172 | 0.9314  | 0.4528 | 0.04127 | 44 | 1.479   | 1.082  | 0.1799  |
| 0.5179 | 0.8927  | 172 | 0.9314  | 0.4528 | 0.04127 | 44 | 1.479   | 1.082  | 0.1799  |
| 0.8928 | 0.08859 | 172 | -0.8564 | 0.9901 | 0.3883  | 44 | -1.658  | 2.613  | 0.5296  |
| 0.5267 | 0.2648  | 172 | -0.7183 | 0.4702 | 0.1285  | 44 | -1.508  | 1.229  | 0.2276  |
| 0.5179 | 0.8927  | 172 | 0.9314  | 0.4528 | 0.04127 | 44 | 1.479   | 1.082  | 0.1799  |
| 0.5179 | 0.8927  | 172 | 0.9314  | 0.4528 | 0.04127 | 44 | 1.479   | 1.082  | 0.1799  |
| 0.4345 | 0.5297  | 172 | -0.3101 | 0.4804 | 0.5194  | 44 | -0.2454 | 0.9558 | 0.7988  |
| 0.843  | 0.2492  | 172 | 1.53    | 0.7278 | 0.03701 | 44 | 1.297   | 1.729  | 0.4577  |
| 0.4786 | 0.01251 | 172 | 0.9655  | 0.4744 | 0.04343 | 44 | 1.596   | 1.066  | 0.1428  |
| 0.5269 | 0.2934  | 172 | -0.7183 | 0.4702 | 0.1285  | 44 | -1.508  | 1.229  | 0.2276  |
| 1.015  | 0.6154  | 172 | 1.701   | 0.7036 | 0.01671 | 44 | 2.468   | 1.803  | 0.1795  |
| 1.015  | 0.6154  | 172 | 1.683   | 0.7102 | 0.01893 | 44 | 2.468   | 1.803  | 0.1795  |
| 0.4868 | 0.963   | 172 | -0.3237 | 0.4445 | 0.4675  | 44 | 0.189   | 1.141  | 0.8693  |
| 0.5179 | 0.8927  | 172 | 0.9314  | 0.4528 | 0.04127 | 44 | 1.479   | 1.082  | 0.1799  |
| 0.5589 | 0.1735  | 172 | -0.7229 | 0.4845 | 0.1376  | 44 | 1.876   | 1.025  | 0.07521 |
| 0.5946 | 0.6702  | 172 | 0.4201  | 0.5285 | 0.4278  | 44 | 1.753   | 1.523  | 0.2571  |
| 0.8928 | 0.08859 | 172 | -0.8564 | 0.9901 | 0.3883  | 44 | -1.658  | 2.613  | 0.5296  |
| 0.5589 | 0.1735  | 172 | -0.7229 | 0.4845 | 0.1376  | 44 | 1.876   | 1.025  | 0.07521 |
| 0.4868 | 0.963   | 172 | -0.3237 | 0.4445 | 0.4675  | 44 | 0.189   | 1.141  | 0.8693  |
| 0.4345 | 0.5297  | 172 | -0.2655 | 0.4749 | 0.5769  | 44 | -0.7918 | 0.9843 | 0.4263  |
| 0.4851 | 0.08092 | 172 | -0.6435 | 0.4344 | 0.1405  | 44 | -1.673  | 1.181  | 0.1651  |
| 0.5218 | 0.3517  | 172 | -0.5958 | 0.4822 | 0.2184  | 44 | -1.51   | 1.317  | 0.2589  |
| 3.058  | 0.1225  | 172 | -0.1558 | 1.446  | 0.9144  | 44 | 2.284   | 2.54   | 0.3745  |
| 0.4815 | 0.5204  | 172 | -0.1278 | 0.4318 | 0.7676  | 44 | -0.9708 | 1.076  | 0.3726  |
| 0.7847 | 0.1501  | 172 | 0.3     | 0.6688 | 0.6543  | 44 | 3.18    | 1.928  | 0.1075  |
| 0.4984 | 0.1271  | 172 | -0.1433 | 0.4504 | 0.7507  | 44 | 1.766   | 1.105  | 0.1186  |
| 0.4851 | 0.08092 | 172 | -0.5384 | 0.4324 | 0.2149  | 44 | -1.673  | 1.181  | 0.1651  |
| 1.811  | 0.1937  | 172 | -2.621  | 1.309  | 0.0468  | 44 | -3.836  | 2.637  | 0.1543  |
| 0.4815 | 0.5204  | 172 | -0.1278 | 0.4318 | 0.7676  | 44 | -0.9708 | 1.076  | 0.3726  |
| 0.616  | 0.3918  | 172 | -0.4077 | 0.5431 | 0.4539  | 44 | 1.417   | 1.108  | 0.209   |
| 1.036  | 0.8065  | 172 | 0.5353  | 0.9743 | 0.5835  | 44 | 5.997   | 2.882  | 0.04439 |
| 0.4965 | 0.6065  | 172 | -0.1893 | 0.45   | 0.6746  | 44 | 0.189   | 1.141  | 0.8693  |
| 1.057  | 0.6421  | 172 | 0.658   | 1.019  | 0.5193  | 44 | 5.997   | 2.882  | 0.04439 |
| 0.4675 | 0.01037 | 172 | 0.1195  | 0.5093 | 0.8148  | 44 | -1.7    | 1.383  | 0.2267  |
| 0.4675 | 0.01037 | 172 | 0.1195  | 0.5093 | 0.8148  | 44 | -1.7    | 1.383  | 0.2267  |
| 0.4675 | 0.01037 | 172 | 0.1195  | 0.5093 | 0.8148  | 44 | -1.7    | 1.383  | 0.2267  |
| 0.4675 | 0.01037 | 172 | 0.1195  | 0.5093 | 0.8148  | 44 | -1.7    | 1.383  | 0.2267  |
| 0.4675 | 0.01037 | 172 | 0.1195  | 0.5093 | 0.8148  | 44 | -1.7    | 1.383  | 0.2267  |
| 0.4675 | 0.01037 | 172 | 0.1195  | 0.5093 | 0.8148  | 44 | -1.7    | 1.383  | 0.2267  |
| 0.4675 | 0.01037 | 172 | 0.1195  | 0.5093 | 0.8148  | 44 | -1.7    | 1.383  | 0.2267  |
| 0.4675 | 0.01037 | 172 | 0.1195  | 0.5093 | 0.8148  | 44 | -1.7    | 1.383  | 0.2267  |
| 1.057  | 0.6421  | 172 | 0.5157  | 0.9979 | 0.606   | 44 | 5.997   | 2.882  | 0.04439 |
| 0.4675 | 0.01037 | 172 | 0.2144  | 0.5014 | 0.6695  | 44 | -1.7    | 1.383  | 0.2267  |
| 1.036  | 0.8065  | 172 | 0.5353  | 0.9743 | 0.5835  | 44 | 5.997   | 2.882  | 0.04439 |
| 0.4675 | 0.01037 | 172 | 0.2144  | 0.5014 | 0.6695  | 44 | -1.7    | 1.383  | 0.2267  |
| 0.4558 | 0.5965  | 172 | 0.5114  | 0.4608 | 0.2687  | 44 | -0.7744 | 1.004  | 0.4455  |

|        |          |     |          |        |        |    |         |        |         |
|--------|----------|-----|----------|--------|--------|----|---------|--------|---------|
| 1.036  | 0.8065   | 172 | 0.5353   | 0.9743 | 0.5835 | 44 | 5.997   | 2.882  | 0.04439 |
| 1.048  | 0.5974   | 172 | -0.03776 | 0.8351 | 0.964  | 44 | -1.148  | 1.957  | 0.5609  |
| 1.057  | 0.6421   | 172 | 0.658    | 1.019  | 0.5193 | 44 | 5.997   | 2.882  | 0.04439 |
| 1.057  | 0.6421   | 172 | 0.658    | 1.019  | 0.5193 | 44 | 5.997   | 2.882  | 0.04439 |
| 1.057  | 0.6421   | 172 | 0.658    | 1.019  | 0.5193 | 44 | 5.997   | 2.882  | 0.04439 |
| 0.4119 | 0.7033   | 172 | 0.1586   | 0.4799 | 0.7414 | 44 | -0.8888 | 1.036  | 0.3963  |
| 1.057  | 0.6421   | 172 | 0.5157   | 0.9979 | 0.606  | 44 | 5.997   | 2.882  | 0.04439 |
| 1.057  | 0.6421   | 172 | 0.5157   | 0.9979 | 0.606  | 44 | 5.997   | 2.882  | 0.04439 |
| 0.7294 | 0.04669  | 172 | 0.1625   | 0.6463 | 0.8018 | 44 | 0.6134  | 1.658  | 0.7135  |
| 0.459  | 0.002738 | 172 | -0.3906  | 0.4895 | 0.426  | 44 | -0.5624 | 1.024  | 0.586   |
| 1.036  | 0.8065   | 172 | 0.6722   | 0.9943 | 0.5    | 44 | 5.997   | 2.882  | 0.04439 |
| 0.7294 | 0.04669  | 172 | 0.1625   | 0.6463 | 0.8018 | 44 | 0.6134  | 1.658  | 0.7135  |
| 0.5448 | 0.03551  | 172 | -0.778   | 0.5131 | 0.1314 | 44 | -0.4235 | 1.147  | 0.7142  |
| 0.7177 | 0.04114  | 172 | 0.1625   | 0.6463 | 0.8018 | 44 | 0.6134  | 1.658  | 0.7135  |
| 0.6543 | 0.07365  | 172 | -0.2191  | 0.9124 | 0.8105 | 44 | 0.4842  | 1.645  | 0.7701  |
| 0.4777 | 0.9261   | 172 | -0.1463  | 0.4939 | 0.7675 | 44 | 1.537   | 0.9903 | 0.1291  |
| 1.057  | 0.6421   | 172 | 0.658    | 1.019  | 0.5193 | 44 | 5.997   | 2.882  | 0.04439 |
| 0.459  | 0.002738 | 172 | -0.3906  | 0.4895 | 0.426  | 44 | -0.5624 | 1.024  | 0.586   |
| 0.459  | 0.002738 | 172 | -0.3906  | 0.4895 | 0.426  | 44 | -0.5624 | 1.024  | 0.586   |
| 1.057  | 0.6421   | 172 | 0.5157   | 0.9979 | 0.606  | 44 | 5.997   | 2.882  | 0.04439 |
| 1.057  | 0.6421   | 172 | 0.5157   | 0.9979 | 0.606  | 44 | 5.997   | 2.882  | 0.04439 |
| 0.576  | 0.05103  | 172 | -0.8002  | 0.4833 | 0.0997 | 44 | 1.621   | 1.049  | 0.1307  |
| 0.459  | 0.002738 | 172 | -0.3906  | 0.4895 | 0.426  | 44 | -0.5624 | 1.024  | 0.586   |
| 1.057  | 0.6421   | 172 | 0.5157   | 0.9979 | 0.606  | 44 | 5.997   | 2.882  | 0.04439 |
| 0.465  | 0.001289 | 172 | -0.3906  | 0.4895 | 0.426  | 44 | -0.5624 | 1.024  | 0.586   |

| BLSA (PiB) |         |        |          | WRAP (PiB) |          |        |         |
|------------|---------|--------|----------|------------|----------|--------|---------|
| N          | BETA    | SE     | P        | N          | BETA     | SE     | P       |
| 144        | 2.492   | 0.9855 | 0.01258  | 89         | 1.643    | 0.8719 | 0.06313 |
| 144        | 2.39    | 0.8009 | 0.003372 | 89         | 1.559    | 0.8491 | 0.07    |
| 144        | 2.048   | 1.041  | 0.05107  | 89         | 1.735    | 0.8859 | 0.05356 |
| 144        | 2.279   | 0.7987 | 0.005006 | 89         | 1.559    | 0.8491 | 0.07    |
| 144        | 2.048   | 1.041  | 0.05107  | 89         | 1.735    | 0.8859 | 0.05356 |
| 144        | 2.048   | 1.041  | 0.05107  | 89         | 1.735    | 0.8859 | 0.05356 |
| 144        | 2.279   | 0.7987 | 0.005006 | 89         | 1.559    | 0.8491 | 0.07    |
| 144        | 2.279   | 0.7987 | 0.005006 | 89         | 1.347    | 0.8513 | 0.1175  |
| 144        | 2.048   | 1.041  | 0.05107  | 89         | 1.516    | 0.8924 | 0.09323 |
| 144        | 2.279   | 0.7987 | 0.005006 | 89         | 1.347    | 0.8513 | 0.1175  |
| 144        | 2.048   | 1.041  | 0.05107  | 89         | 1.605    | 0.8979 | 0.07755 |
| 144        | 2.048   | 1.041  | 0.05107  | 89         | 1.605    | 0.8979 | 0.07755 |
| 144        | 2.048   | 1.041  | 0.05107  | 89         | 1.605    | 0.8979 | 0.07755 |
| 144        | 1.314   | 1.194  | 0.273    | 89         | 0.9694   | 0.9638 | 0.3175  |
| 144        | -0.4365 | 0.6553 | 0.5065   | 89         | -0.9726  | 0.83   | 0.2447  |
| 144        | -0.7821 | 0.6695 | 0.2447   | 89         | -0.6957  | 0.7326 | 0.3451  |
| 144        | -0.7821 | 0.6695 | 0.2447   | 89         | -0.6957  | 0.7326 | 0.3451  |
| 144        | -0.7821 | 0.6695 | 0.2447   | 89         | -0.6957  | 0.7326 | 0.3451  |
| 144        | -0.7821 | 0.6695 | 0.2447   | 89         | -0.6957  | 0.7326 | 0.3451  |
| 144        | -0.7821 | 0.6695 | 0.2447   | 89         | -0.6957  | 0.7326 | 0.3451  |
| 144        | -0.7605 | 0.6677 | 0.2567   | 89         | -0.6957  | 0.7326 | 0.3451  |
| 144        | -0.8128 | 0.6978 | 0.2461   | 89         | -0.3578  | 0.8326 | 0.6685  |
| 144        | -0.9766 | 0.668  | 0.1461   | 89         | -0.7136  | 0.8174 | 0.3852  |
| 144        | -1.202  | 0.6636 | 0.07229  | 89         | -0.7137  | 0.835  | 0.3952  |
| 144        | -1.127  | 0.6624 | 0.09101  | 89         | -0.7137  | 0.835  | 0.3952  |
| 144        | -1.086  | 0.6616 | 0.1031   | 89         | -0.7627  | 0.8352 | 0.3638  |
| 144        | 0.0225  | 0.7872 | 0.9772   | 89         | 0.000466 | 0.8215 | 0.9995  |
| 144        | -1.115  | 0.6613 | 0.09395  | 89         | -0.7137  | 0.835  | 0.3952  |
| 144        | 0.3496  | 0.691  | 0.6138   | 89         | -0.8992  | 0.7304 | 0.2218  |
| 144        | -0.301  | 0.6907 | 0.6637   | 89         | -0.4216  | 0.6991 | 0.5481  |
| 144        | 0.245   | 0.6848 | 0.7211   | 89         | 0.9825   | 0.7368 | 0.1861  |
| 144        | -0.301  | 0.6907 | 0.6637   | 89         | -0.4216  | 0.6991 | 0.5481  |
| 144        | -0.6282 | 0.7494 | 0.4034   | 89         | -0.2981  | 0.8127 | 0.7147  |
| 144        | -0.6282 | 0.7494 | 0.4034   | 89         | -0.3287  | 0.815  | 0.6878  |
| 144        | -0.6282 | 0.7494 | 0.4034   | 89         | -0.3287  | 0.815  | 0.6878  |
| 144        | -0.6282 | 0.7494 | 0.4034   | 89         | -0.2981  | 0.8127 | 0.7147  |
| 144        | -0.7701 | 0.7259 | 0.2906   | 89         | -0.2608  | 0.7885 | 0.7417  |
| 144        | -1.569  | 0.6605 | 0.01893  | 89         | -0.3492  | 0.8168 | 0.6702  |
| 144        | -0.6146 | 0.7544 | 0.4167   | 89         | -0.2981  | 0.8127 | 0.7147  |
| 144        | -0.569  | 0.7529 | 0.4511   | 89         | -0.2981  | 0.8127 | 0.7147  |
| 144        | -0.9978 | 0.6666 | 0.1368   | 89         | -0.3003  | 0.8503 | 0.7248  |

|     |         |        |        |    |         |        |         |
|-----|---------|--------|--------|----|---------|--------|---------|
| 144 | -0.6157 | 0.6863 | 0.3713 | 89 | 0.2901  | 0.7814 | 0.7114  |
| 144 | -0.6157 | 0.6863 | 0.3713 | 89 | 0.2901  | 0.7814 | 0.7114  |
| 144 | -0.9347 | 0.7199 | 0.1963 | 89 | -0.2263 | 0.7961 | 0.7769  |
| 144 | -0.9347 | 0.7199 | 0.1963 | 89 | -0.2436 | 0.7945 | 0.7599  |
| 144 | 0.8248  | 1.293  | 0.5246 | 89 | 3.451   | 1.473  | 0.02155 |
| 144 | -0.6157 | 0.6863 | 0.3713 | 89 | 0.2901  | 0.7814 | 0.7114  |
| 144 | -0.6767 | 0.6895 | 0.3281 | 89 | 0.2901  | 0.7814 | 0.7114  |
| 144 | -0.6767 | 0.6895 | 0.3281 | 89 | 0.2901  | 0.7814 | 0.7114  |
| 144 | -0.6767 | 0.6895 | 0.3281 | 89 | 0.2901  | 0.7814 | 0.7114  |
| 144 | -0.6767 | 0.6895 | 0.3281 | 89 | 0.2901  | 0.7814 | 0.7114  |
| 144 | -0.6767 | 0.6895 | 0.3281 | 89 | 0.2901  | 0.7814 | 0.7114  |
| 144 | 0.8248  | 1.293  | 0.5246 | 89 | 3.451   | 1.473  | 0.02155 |
| 144 | 0.8248  | 1.293  | 0.5246 | 89 | 3.451   | 1.473  | 0.02155 |
| 144 | -0.905  | 0.7179 | 0.2096 | 89 | 0.4499  | 0.7909 | 0.571   |
| 144 | -0.6767 | 0.6895 | 0.3281 | 89 | 0.2901  | 0.7814 | 0.7114  |
| 144 | 0.4306  | 1.344  | 0.7492 | 89 | 3.451   | 1.473  | 0.02155 |
| 144 | 0.8248  | 1.293  | 0.5246 | 89 | 3.451   | 1.473  | 0.02155 |
| 144 | -0.905  | 0.7179 | 0.2096 | 89 | 0.3123  | 0.787  | 0.6925  |
| 144 | -0.905  | 0.7179 | 0.2096 | 89 | 0.3123  | 0.787  | 0.6925  |
| 144 | -0.905  | 0.7179 | 0.2096 | 89 | 0.3123  | 0.787  | 0.6925  |
| 144 | 0.7546  | 1.271  | 0.5537 | 89 | 3.451   | 1.473  | 0.02155 |
| 144 | 0.8248  | 1.293  | 0.5246 | 89 | 3.451   | 1.473  | 0.02155 |
| 144 | 0.8248  | 1.293  | 0.5246 | 89 | 3.451   | 1.473  | 0.02155 |
| 144 | 0.7546  | 1.271  | 0.5537 | 89 | 3.451   | 1.473  | 0.02155 |
| 144 | -0.905  | 0.7179 | 0.2096 | 89 | 0.3123  | 0.787  | 0.6925  |
| 144 | -0.905  | 0.7179 | 0.2096 | 89 | 0.3123  | 0.787  | 0.6925  |
| 144 | 0.8248  | 1.293  | 0.5246 | 89 | 3.451   | 1.473  | 0.02155 |
| 144 | -0.905  | 0.7179 | 0.2096 | 89 | 0.3123  | 0.787  | 0.6925  |
| 144 | -0.8606 | 0.7251 | 0.2373 | 89 | 0.3123  | 0.787  | 0.6925  |
| 144 | -0.8606 | 0.7251 | 0.2373 | 89 | 0.3123  | 0.787  | 0.6925  |
| 144 | -0.6518 | 0.7447 | 0.383  | 89 | -0.2264 | 0.8348 | 0.7869  |
| 144 | -0.6518 | 0.7447 | 0.383  | 89 | -0.2264 | 0.8348 | 0.7869  |
| 144 | -0.6028 | 0.6629 | 0.3648 | 89 | -0.6069 | 0.7574 | 0.4253  |
| 144 | -0.6049 | 0.7555 | 0.4247 | 89 | -0.2264 | 0.8348 | 0.7869  |
| 144 | -0.6049 | 0.7555 | 0.4247 | 89 | -0.2264 | 0.8348 | 0.7869  |
| 144 | -0.6729 | 0.7586 | 0.3766 | 89 | -0.3622 | 0.8254 | 0.662   |
| 144 | -0.6049 | 0.7555 | 0.4247 | 89 | -0.2264 | 0.8348 | 0.7869  |
| 144 | 1.085   | 0.6908 | 0.1185 | 89 | 0.8965  | 0.8023 | 0.2671  |
| 144 | -0.8606 | 0.7251 | 0.2373 | 89 | 0.3123  | 0.787  | 0.6925  |
| 144 | 0.1592  | 0.7529 | 0.8329 | 89 | 0.818   | 0.7625 | 0.2865  |
| 144 | 0.1592  | 0.7529 | 0.8329 | 89 | 0.818   | 0.7625 | 0.2865  |
| 144 | 0.1592  | 0.7529 | 0.8329 | 89 | 0.818   | 0.7625 | 0.2865  |
| 144 | 0.3219  | 0.7525 | 0.6694 | 89 | 0.818   | 0.7625 | 0.2865  |
| 144 | 0.3219  | 0.7525 | 0.6694 | 89 | 0.818   | 0.7625 | 0.2865  |
| 144 | 0.3219  | 0.7525 | 0.6694 | 89 | 0.818   | 0.7625 | 0.2865  |
| 144 | 0.347   | 0.7366 | 0.6384 | 89 | 0.9137  | 0.7524 | 0.2281  |
| 144 | -0.7667 | 0.709  | 0.2814 | 89 | 0.1647  | 0.7975 | 0.8369  |

|     |         |        |         |    |         |        |         |
|-----|---------|--------|---------|----|---------|--------|---------|
| 144 | 0.3219  | 0.7525 | 0.6694  | 89 | 0.818   | 0.7625 | 0.2865  |
| 144 | 0.3219  | 0.7525 | 0.6694  | 89 | 0.818   | 0.7625 | 0.2865  |
| 144 | 0.1592  | 0.7529 | 0.8329  | 89 | 0.8827  | 0.7554 | 0.246   |
| 144 | -2.085  | 1.483  | 0.162   | 89 | -2.004  | 1.719  | 0.2472  |
| 144 | -0.6049 | 0.7555 | 0.4247  | 89 | -0.2743 | 0.8362 | 0.7437  |
| 144 | 0.1592  | 0.7529 | 0.8329  | 89 | 0.818   | 0.7625 | 0.2865  |
| 144 | 0.07213 | 0.7585 | 0.9244  | 89 | 0.818   | 0.7625 | 0.2865  |
| 144 | -0.5075 | 0.6592 | 0.4427  | 89 | -0.36   | 0.7188 | 0.6178  |
| 144 | -0.3372 | 1.216  | 0.7819  | 89 | 2.005   | 1.386  | 0.1519  |
| 144 | -0.7667 | 0.709  | 0.2814  | 89 | 0.2059  | 0.7944 | 0.7962  |
| 144 | -0.6049 | 0.7555 | 0.4247  | 89 | -0.2743 | 0.8362 | 0.7437  |
| 144 | 0.8248  | 1.293  | 0.5246  | 89 | 3.451   | 1.473  | 0.02155 |
| 144 | 0.7165  | 1.266  | 0.5724  | 89 | 3.451   | 1.473  | 0.02155 |
| 144 | -0.5007 | 0.6685 | 0.4552  | 89 | -0.6069 | 0.7574 | 0.4253  |
| 144 | 0.1592  | 0.7529 | 0.8329  | 89 | 0.8827  | 0.7554 | 0.246   |
| 144 | -0.3894 | 0.7933 | 0.6244  | 89 | 0.7412  | 0.8362 | 0.378   |
| 144 | 1.263   | 0.7315 | 0.08654 | 89 | -0.6613 | 0.839  | 0.4329  |
| 144 | -2.085  | 1.483  | 0.162   | 89 | -2.004  | 1.719  | 0.2472  |
| 144 | -0.3894 | 0.7933 | 0.6244  | 89 | 0.7412  | 0.8362 | 0.378   |
| 144 | -0.5007 | 0.6685 | 0.4552  | 89 | -0.4088 | 0.748  | 0.5862  |
| 144 | -0.5453 | 0.644  | 0.3987  | 89 | -0.4693 | 0.7428 | 0.5293  |
| 144 | -0.7797 | 0.7001 | 0.2673  | 89 | 0.08278 | 0.813  | 0.9191  |
| 144 | -0.7877 | 0.7512 | 0.2962  | 89 | -0.2498 | 0.8407 | 0.7672  |
| 144 | -2.439  | 2.009  | 0.2268  | 89 | -1.573  | 2.487  | 0.529   |
| 144 | -0.5442 | 0.659  | 0.4103  | 89 | -1.093  | 0.7529 | 0.1504  |
| 144 | -0.3656 | 1.023  | 0.7214  | 89 | -0.117  | 1.166  | 0.9203  |
| 144 | 0.2178  | 0.7114 | 0.76    | 89 | -0.6269 | 0.775  | 0.4209  |
| 144 | -0.7797 | 0.7001 | 0.2673  | 89 | 0.08278 | 0.813  | 0.9191  |
| 144 | -0.1245 | 1.461  | 0.9322  | 89 | -3.955  | 2.519  | 0.1202  |
| 144 | -0.5442 | 0.659  | 0.4103  | 89 | -1.093  | 0.7529 | 0.1504  |
| 144 | -0.0836 | 0.8604 | 0.9227  | 89 | 0.9352  | 1.02   | 0.3619  |
| 144 | 0.2263  | 1.564  | 0.8852  | 89 | 2.348   | 1.407  | 0.0989  |
| 144 | -0.5007 | 0.6685 | 0.4552  | 89 | -0.4088 | 0.748  | 0.5862  |
| 144 | 0.031   | 1.668  | 0.9852  | 89 | 2.591   | 1.451  | 0.07783 |
| 144 | 0.1104  | 0.8638 | 0.8985  | 89 | -0.9404 | 0.882  | 0.2895  |
| 144 | 0.1104  | 0.8638 | 0.8985  | 89 | -0.9404 | 0.882  | 0.2895  |
| 144 | 0.1104  | 0.8638 | 0.8985  | 89 | -0.9404 | 0.882  | 0.2895  |
| 144 | 0.1104  | 0.8638 | 0.8985  | 89 | -0.9404 | 0.882  | 0.2895  |
| 144 | 0.1104  | 0.8638 | 0.8985  | 89 | -0.9404 | 0.882  | 0.2895  |
| 144 | 0.1104  | 0.8638 | 0.8985  | 89 | -0.9404 | 0.882  | 0.2895  |
| 144 | 0.1104  | 0.8638 | 0.8985  | 89 | -0.9404 | 0.882  | 0.2895  |
| 144 | 0.1104  | 0.8638 | 0.8985  | 89 | -0.9404 | 0.882  | 0.2895  |
| 144 | 0.1104  | 0.8638 | 0.8985  | 89 | -0.9404 | 0.882  | 0.2895  |
| 144 | 0.031   | 1.668  | 0.9852  | 89 | 2.591   | 1.451  | 0.07783 |
| 144 | 0.1104  | 0.8638 | 0.8985  | 89 | -0.9404 | 0.882  | 0.2895  |
| 144 | 0.5787  | 1.611  | 0.72    | 89 | 2.348   | 1.407  | 0.0989  |
| 144 | 0.1104  | 0.8638 | 0.8985  | 89 | -0.9404 | 0.882  | 0.2895  |
| 144 | -0.6124 | 0.6819 | 0.3707  | 89 | -0.896  | 0.6966 | 0.202   |

|     |         |        |         |    |         |        |         |
|-----|---------|--------|---------|----|---------|--------|---------|
| 144 | 0.2263  | 1.564  | 0.8852  | 89 | 2.348   | 1.407  | 0.0989  |
| 144 | -0.3103 | 1.114  | 0.7811  | 89 | 0.03348 | 1.216  | 0.9781  |
| 144 | 0.031   | 1.668  | 0.9852  | 89 | 2.168   | 1.696  | 0.2047  |
| 144 | 0.031   | 1.668  | 0.9852  | 89 | 2.168   | 1.696  | 0.2047  |
| 144 | 0.031   | 1.668  | 0.9852  | 89 | 2.168   | 1.696  | 0.2047  |
| 144 | -0.892  | 0.6959 | 0.2021  | 89 | -0.2524 | 0.7444 | 0.7354  |
| 144 | 0.031   | 1.668  | 0.9852  | 89 | 2.168   | 1.696  | 0.2047  |
| 144 | 0.031   | 1.668  | 0.9852  | 89 | 2.168   | 1.696  | 0.2047  |
| 144 | 0.3801  | 0.8846 | 0.6681  | 89 | 1.299   | 1.08   | 0.2327  |
| 144 | 1.151   | 0.6455 | 0.07676 | 89 | 1.192   | 0.686  | 0.086   |
| 144 | 0.2263  | 1.564  | 0.8852  | 89 | 2.348   | 1.407  | 0.0989  |
| 144 | 0.3801  | 0.8846 | 0.6681  | 89 | 1.299   | 1.08   | 0.2327  |
| 144 | -0.1251 | 0.7208 | 0.8624  | 89 | -0.8226 | 0.7633 | 0.2844  |
| 144 | 0.3801  | 0.8846 | 0.6681  | 89 | 1.299   | 1.08   | 0.2327  |
| 144 | 1.382   | 1.271  | 0.2788  | 89 | -0.8928 | 1.347  | 0.5092  |
| 144 | 0.7855  | 0.695  | 0.2604  | 89 | 1.053   | 0.8063 | 0.195   |
| 144 | 0.031   | 1.668  | 0.9852  | 89 | 2.591   | 1.451  | 0.07783 |
| 144 | 1.151   | 0.6455 | 0.07676 | 89 | 1.192   | 0.686  | 0.086   |
| 144 | 1.151   | 0.6455 | 0.07676 | 89 | 1.192   | 0.686  | 0.086   |
| 144 | 0.031   | 1.668  | 0.9852  | 89 | 2.591   | 1.451  | 0.07783 |
| 144 | 0.031   | 1.668  | 0.9852  | 89 | 2.591   | 1.451  | 0.07783 |
| 144 | -0.5868 | 0.792  | 0.4601  | 89 | 0.2312  | 0.8134 | 0.7769  |
| 144 | 1.027   | 0.6504 | 0.1167  | 89 | 1.192   | 0.686  | 0.086   |
| 144 | 0.031   | 1.668  | 0.9852  | 89 | 2.591   | 1.451  | 0.07783 |
| 144 | 1.151   | 0.6455 | 0.07676 | 89 | 1.192   | 0.686  | 0.086   |

| <b>eTable 4: <i>RBFOX1</i> brain expression associations with amyloid burden adjusted for cell-type composition</b>                                                                                                                                                                                                                                                                                                                              |             |          |
|--------------------------------------------------------------------------------------------------------------------------------------------------------------------------------------------------------------------------------------------------------------------------------------------------------------------------------------------------------------------------------------------------------------------------------------------------|-------------|----------|
| <b>Model</b>                                                                                                                                                                                                                                                                                                                                                                                                                                     | <b>Beta</b> | <b>P</b> |
| Main                                                                                                                                                                                                                                                                                                                                                                                                                                             | -0.008      | 0.002    |
| Main + covaried for all cell type fractions                                                                                                                                                                                                                                                                                                                                                                                                      | -0.009      | 0.003    |
| Main + covaried for endothelial and pericyte cell fraction                                                                                                                                                                                                                                                                                                                                                                                       | -0.01       | 0.015    |
| Main + covaried for astrocyte fraction                                                                                                                                                                                                                                                                                                                                                                                                           | -0.011      | 0.002    |
| Main + covaried for excitatory neuron fraction                                                                                                                                                                                                                                                                                                                                                                                                   | -0.01       | 0.021    |
| Main + covaried for inhibitory neuron fraction                                                                                                                                                                                                                                                                                                                                                                                                   | -0.011      | 0.002    |
| Main + covaried for microglial fraction                                                                                                                                                                                                                                                                                                                                                                                                          | -0.015      | 1.90E-05 |
| Main + covaried for oligodendrocyte fraction                                                                                                                                                                                                                                                                                                                                                                                                     | -0.008      | 0.025    |
| Main + covaried for oligodendrocyte progenitor cell fraction                                                                                                                                                                                                                                                                                                                                                                                     | -0.016      | 9.10E-06 |
| <p>Note: The Main Model = amyloid burden ~ <i>RBFOX1</i> expression + age at death + sex + post mortem interval. <i>NRGN</i> was used as the marker for excitatory neurons, <i>GAD1</i> for inhibitory neurons, <i>AQP4</i> for astrocytes, <i>MBP</i> for oligodendrocytes, <i>CSF1R</i> and <i>CD74</i> for microglia, <i>VCAN</i> for oligodendrocyte progenitor cells, <i>FLT1</i> for endothelial cells, and <i>AMBP</i> for pericytes.</p> |             |          |



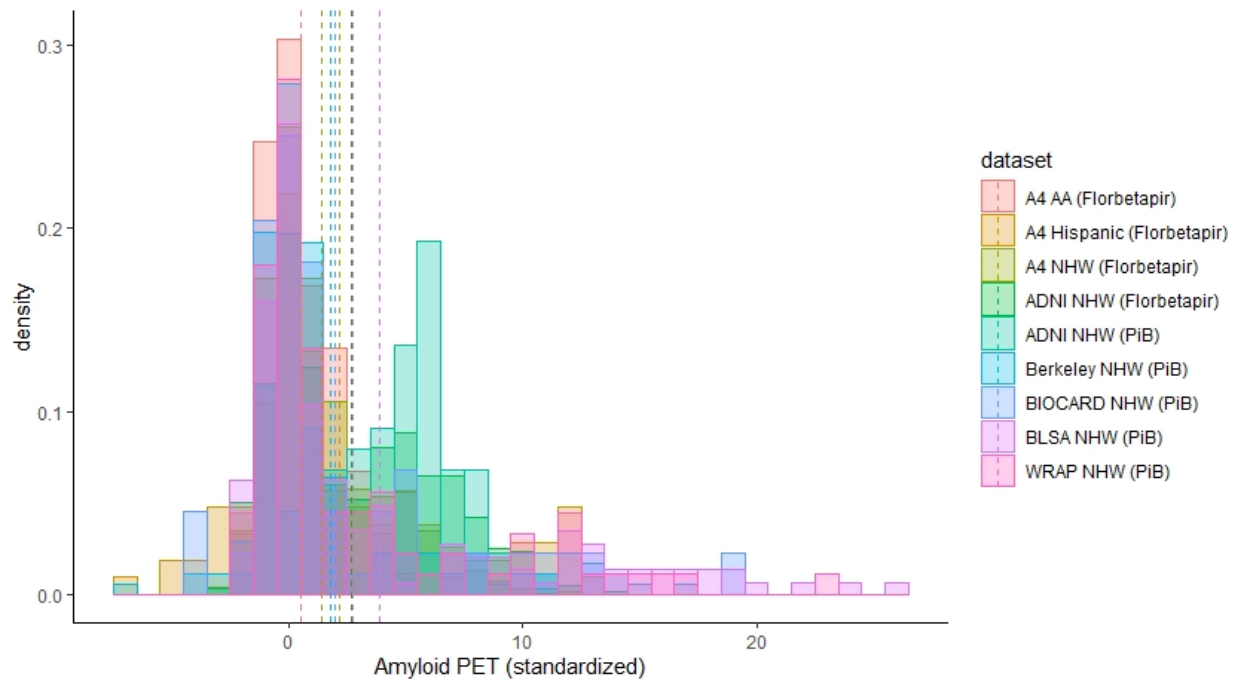

**eFigure 1.** Density histogram of normalized amyloid PET measures per study. All measures were centered and standardized using the mean and standard deviation of the amyloid negative gaussian distribution within study from a mixture model. Histogram is colored by dataset for visualization. The density, or the proportion of total observations that fall within a given bin, is presented on the y-axis. Vertical dotted lines show the mean normalized amyloid PET values of each cohort.

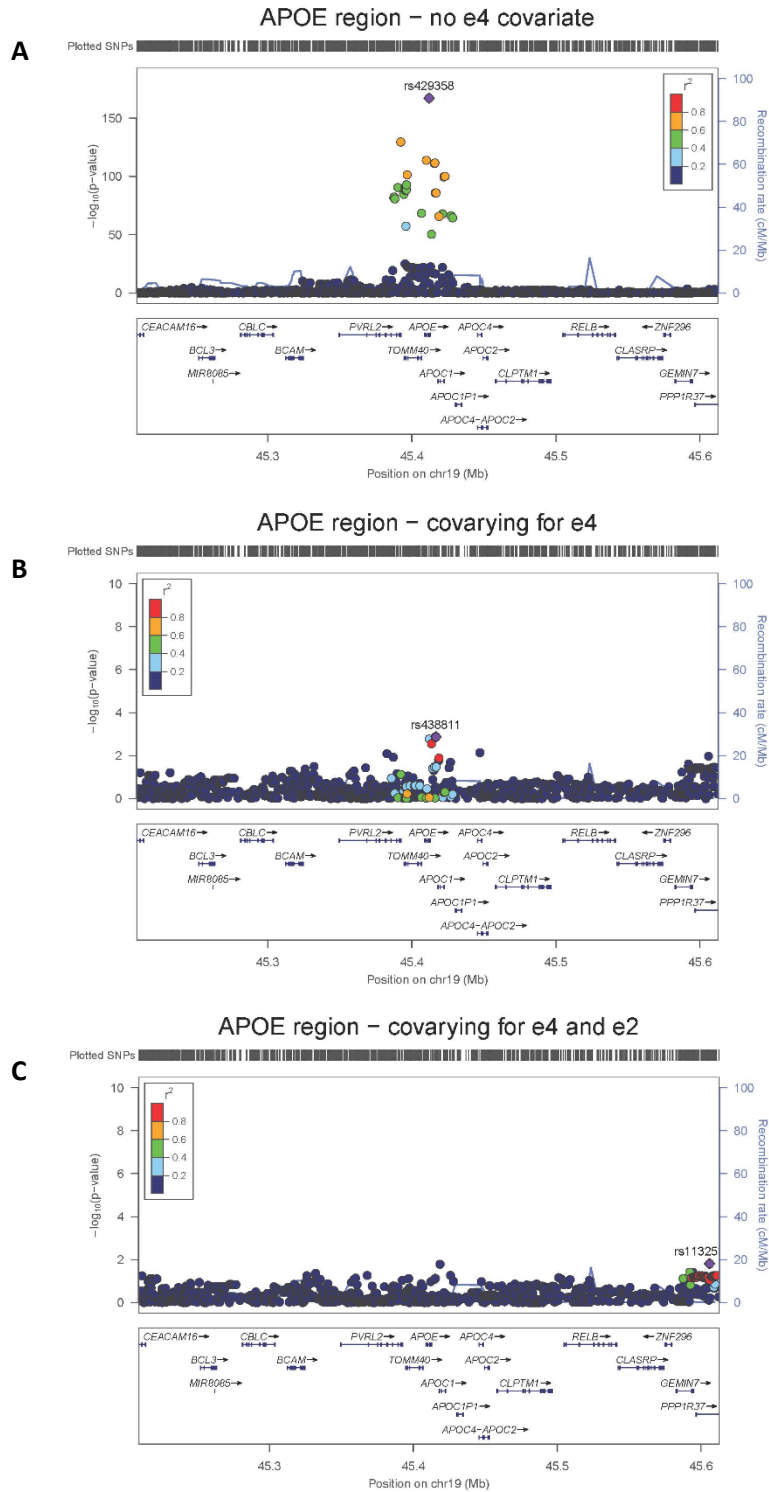

**eFigure 2.** Locus zoom plots of the APOE region in conditional analyses including A) no covariate for APOE- $\epsilon 4$ , B) a APOE  $\epsilon 4$  covariate C) APOE- $\epsilon 4$  and APOE-  $\epsilon 2$  covariates

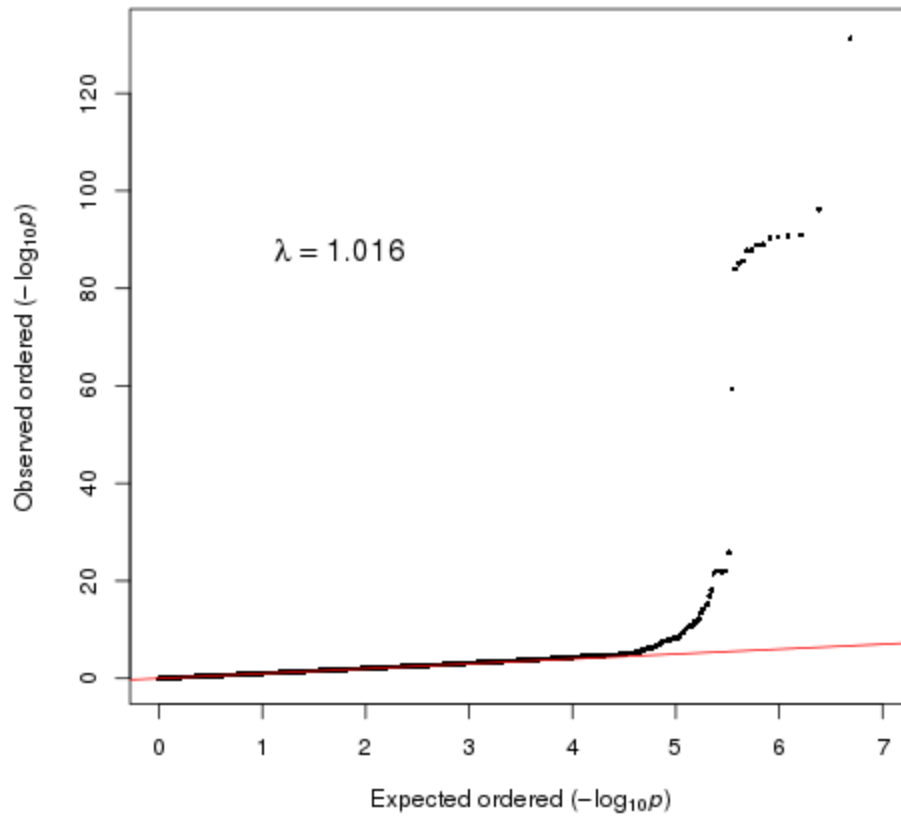

**eFigure 3.** QQ-plot for the meta-analysis of amyloid PET across all cohorts.  $\lambda$  represents the genomic inflation factor.

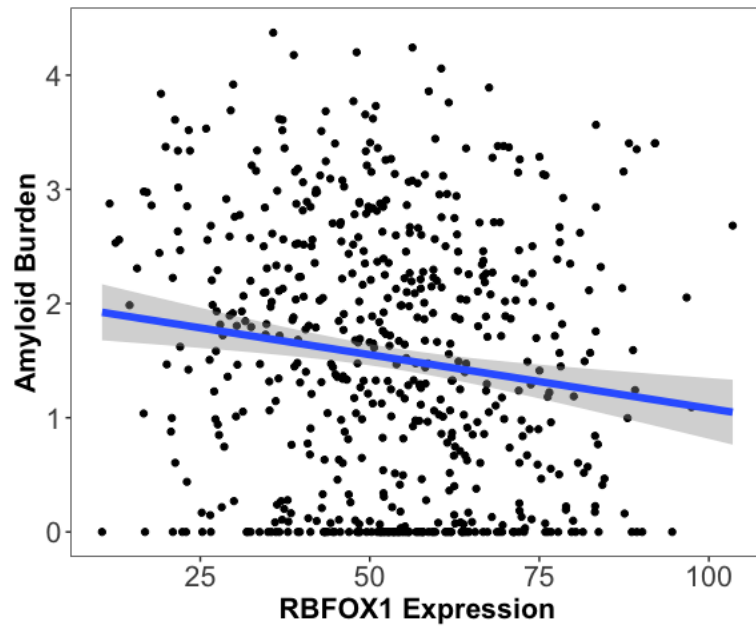

**eFigure 4.** Lower *RBFOX1* expression in the prefrontal cortex was associated with higher amyloid burden (Beta=-0.008, P=0.002).

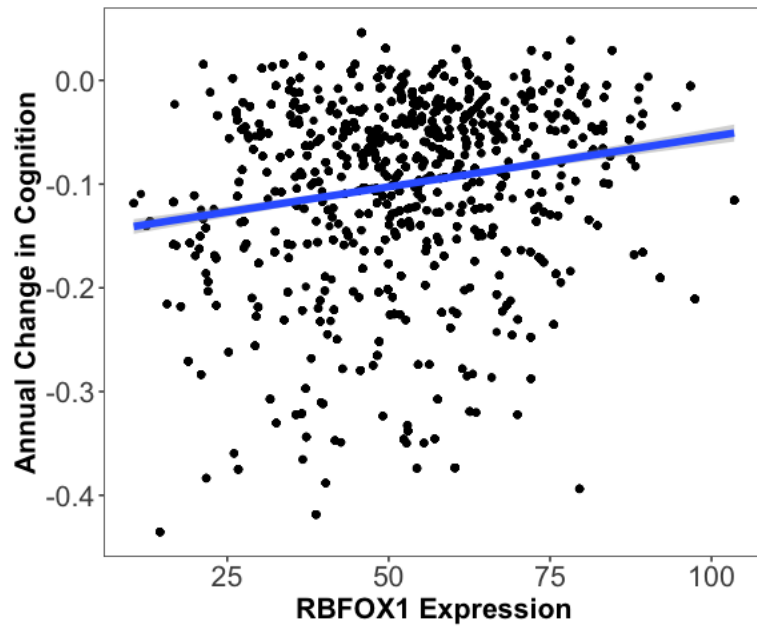

**eFigure 5.** Lower *RBFOX1* expression in the prefrontal cortex was associated with a faster rate of global cognitive decline (Beta=0.001,  $P=4 \times 10^{-5}$ ).
